# Supplementary material for: Molecular Mechanisms for Changing Brain Connectivity in Mice and Humans
Source: MDPI journal article supplement (doi:10.3390/ijms242115840), 2023-10-31
Supplement: s1 [file s1]

## Appendix

Table S1. The rank scores of 25 genes in common that are upregulated with training

rank scores

| gene abbreviation | full gene name                                                | ACC       | HC        |
|-------------------|---------------------------------------------------------------|-----------|-----------|
| astl              | astacin like metalloendopeptidase                             | 2.9782302 | 2.6145406 |
| c9                | complement C9                                                 | 2.4242568 | 2.9751272 |
| cacna2d4          | calcium voltage-gated channel auxiliary subunit alpha2delta 4 | 2.5569508 | 3.471862  |
| card6             | caspase recruitment domain family member 6                    | 2.9706614 | 2.433023  |
| cd40              | CD40 molecule                                                 | 2.4512355 | 3.8273673 |
| dmrtb1            | DMRT like family B with proline rich C-terminal 1             | 2.6347992 | 3.5000591 |
| dnai2             | dynein axonemal intermediate chain 2                          | 2.026856  | 3.2761416 |
| dnase1l2          | deoxyribonuclease 1 like 2                                    | 3.3436997 | 3.72264   |
| entpd8            | ectonucleoside triphosphate diphosphohydrolase 8              | 2.0840733 | 2.364991  |
| ghrh              | growth hormone releasing hormone                              | 2.8068497 | 2.369232  |
| hmox1             | heme oxygenase 1                                              | 2.5849724 | 2.5780656 |
| impdh2            | inosine monophosphate dehydrogenase 2                         | 2.0824804 | 2.2658856 |
| inhbb             | inhibin beta B subunit                                        | 2.61479   | 2.8082063 |
| mbnl3             | muscleblind like splicing regulator 3                         | 3.1857593 | 2.489401  |
| mnx1              | motor neuron and pancreas homeobox 1                          | 3.6334696 | 4.335227  |
| nkx6-1            | NK6 homeobox 1                                                | 2.2450445 | 3.0883238 |
| prrl5l            | proline rich 15 like                                          | 2.5259113 | 4.2262025 |
| rps7              | ribosomal protein S7                                          | 3.7486062 | 3.9771392 |
| senp8             | SUMO/sentrin peptidase family member, NEDD8 specific          | 3.3826416 | 2.3196073 |
| sftpa1            | surfactant protein A1                                         | 2.1839666 | 5.2199636 |
| skp2              | S-phase kinase associated protein 2                           | 2.2981544 | 3.0969088 |
| steap3            | STEAP3 metalloredutase                                        | 2.4964416 | 2.7268634 |
| tbx5              | T-box 5                                                       | 2.2913268 | 3.3157961 |
| trim7             | tripartite motif containing 7                                 | 2.114829  | 2.5109558 |
| znf217            | zinc finger protein 217                                       | 2.3345547 | 2.2881632 |

Table S2. The GSEA results in mouse brain showing the effect of region x training. (NES, normalized enrichment score; p, significance; FDR q, significance when corrected for multiple testing).

|                                                                                     | region:training |        |               | ACC, trained vs control |        |               | HC, trained vs control |        |               |
|-------------------------------------------------------------------------------------|-----------------|--------|---------------|-------------------------|--------|---------------|------------------------|--------|---------------|
| Gene Set Name                                                                       | NES             | p      | FDR q         | NES                     | p      | FDR q         | NES                    | p      | FDR q         |
| <u>REACTOME COLLAGEN CHAIN TRIMERIZATION</u>                                        | 2.35            | 0.0000 | <b>0.0000</b> | -1.96                   | 0.0000 | <b>0.1332</b> | 1.87                   | 0.0000 | <b>0.2134</b> |
| <u>HALLMARK PROTEIN SECRETION</u>                                                   | -2.34           | 0.0000 | <b>0.0000</b> | 1.78                    | 0.0000 | 0.4323        | -1.78                  | 0.0000 | 0.2595        |
| <u>GOBP TRANSEPITHELIAL TRANSPORT</u>                                               | 2.25            | 0.0000 | <b>0.0050</b> | -1.82                   | 0.0000 | 0.3015        | 1.62                   | 0.0151 | 0.3531        |
| <u>GOMF EXTRACELLULAR MATRIX STRUCTURAL CONSTITUENT CONFERRING TENSILE STRENGTH</u> | 2.25            | 0.0000 | <b>0.0053</b> | -2.00                   | 0.0000 | <b>0.1305</b> | 1.85                   | 0.0000 | <b>0.2265</b> |
| REACTOME_COLLAGEN_DEGRADATION                                                       | 2.15            | 0.0000 | <b>0.0227</b> | -2.00                   | 0.0000 | <b>0.1740</b> | 1.68                   | 0.0044 | 0.2923        |
| REACTOME_ASSEMBLY_OF_COLLAGEN_FIBRILS_AND_OTHER_MULTIMERIC_STRUCTURES               | 2.13            | 0.0000 | <b>0.0237</b> | -2.13                   | 0.0000 | <b>0.0744</b> | 1.92                   | 0.0000 | <b>0.1715</b> |

Table 3. The GSEA results in mouse blood showing the effect of training. (NES, normalized enrichment score; p, significance; FDR q, significance when corrected for multiple testing).

| Group                    | Gene Set Name                                                                  | NES                      | p      | FDR q         |
|--------------------------|--------------------------------------------------------------------------------|--------------------------|--------|---------------|
|                          |                                                                                | post, trained vs control |        |               |
| C2 WikiPathways pathway  | <u>WP B CELL RECEPTOR SIGNALING PATHWAY</u>                                    | 2.51                     | 0.0000 | <b>0.0000</b> |
| Hallmark                 | <u>HALLMARK OXIDATIVE PHOSPHORYLATION</u>                                      | 2.32                     | 0.0000 | <b>0.0000</b> |
| C2 PID pathway           | <u>PID BCR 5PATHWAY</u>                                                        | 2.42                     | 0.0000 | <b>0.0000</b> |
| C2 KEGG pathway          | <u>KEGG B CELL RECEPTOR SIGNALING PATHWAY</u>                                  | 2.37                     | 0.0000 | <b>0.0000</b> |
| C5 GO Biological Process | <u>GOBP ANTIGEN RECEPTOR MEDIATED SIGNALING PATHWAY</u>                        | 2.33                     | 0.0000 | <b>0.0000</b> |
| C5 GO Biological Process | <u>GOBP GOLGI VESICLE TRANSPORT</u>                                            | 2.29                     | 0.0000 | <b>0.0002</b> |
| C2 Reactome pathway      | <u>REACTOME SIGNALING BY THE B CELL RECEPTOR BCR</u>                           | 2.27                     | 0.0000 | <b>0.0005</b> |
| C5 GO Biological Process | <u>GOBP B CELL RECEPTOR SIGNALING PATHWAY</u>                                  | 2.25                     | 0.0000 | <b>0.0009</b> |
| C2 PID pathway           | <u>PID ATM PATHWAY</u>                                                         | 2.25                     | 0.0000 | <b>0.0010</b> |
| C2 Reactome pathway      | <u>REACTOME TCR SIGNALING</u>                                                  | 2.23                     | 0.0000 | <b>0.0012</b> |
| C2 PID pathway           | <u>PID TNF PATHWAY</u>                                                         | 2.22                     | 0.0000 | <b>0.0014</b> |
| Hallmark                 | <u>HALLMARK ALLOGRAFT REJECTION</u>                                            | 2.19                     | 0.0000 | <b>0.0017</b> |
| C5 GO Biological Process | <u>GOBP INTRA GOLGI VESICLE MEDIATED TRANSPORT</u>                             | 2.19                     | 0.0000 | <b>0.0018</b> |
| C2 WikiPathways pathway  | <u>WP IL3 SIGNALING PATHWAY</u>                                                | 2.19                     | 0.0000 | <b>0.0019</b> |
| C2 Reactome pathway      | <u>REACTOME HIV INFECTION</u>                                                  | 2.19                     | 0.0000 | <b>0.0021</b> |
| Hallmark                 | <u>HALLMARK MTORC1 SIGNALING</u>                                               | 2.19                     | 0.0000 | <b>0.0021</b> |
| C2 Reactome pathway      | <u>REACTOME INTRA GOLGI TRAFFIC</u>                                            | 2.20                     | 0.0000 | <b>0.0022</b> |
| C2 Reactome pathway      | <u>REACTOME TRANSLOCATION OF SLC2A4 GLUT4 TO THE PLASMA MEMBRANE</u>           | 2.19                     | 0.0000 | <b>0.0022</b> |
| C5 GO Biological Process | <u>GOBP IMMUNE RESPONSE REGULATING CELL SURFACE RECEPTOR SIGNALING PATHWAY</u> | 2.17                     | 0.0000 | <b>0.0026</b> |
| C5 GO Biological Process | <u>GOBP T CELL RECEPTOR SIGNALING PATHWAY</u>                                  | 2.17                     | 0.0000 | <b>0.0027</b> |
| C2 Reactome pathway      | <u>REACTOME SIGNALING BY TGF BETA RECEPTOR COMPLEX</u>                         | 2.16                     | 0.0000 | <b>0.0032</b> |
| C2 Reactome pathway      | <u>REACTOME ER TO GOLGI ANTEROGRADE TRANSPORT</u>                              | 2.15                     | 0.0000 | <b>0.0034</b> |
| C2 PID pathway           | <u>PID TCR PATHWAY</u>                                                         | 2.14                     | 0.0000 | <b>0.0037</b> |
| C2 Reactome pathway      | <u>REACTOME GENERATION OF SECOND MESSENGER MOLECULES</u>                       | 2.14                     | 0.0000 | <b>0.0038</b> |
| C5 GO Cellular Component | <u>GOCC ENDOPLASMIC RETICULUM PROTEIN CONTAINING COMPLEX</u>                   | 2.14                     | 0.0000 | <b>0.0039</b> |

|                          |                                                                                  |      |        |               |
|--------------------------|----------------------------------------------------------------------------------|------|--------|---------------|
| C5 GO Cellular Component | <u>GOCC FICOLIN 1 RICH GRANULE</u>                                               | 2.14 | 0.0000 | <b>0.0039</b> |
| C5 GO Biological Process | <u>GOBP IMMUNE RESPONSE REGULATING SIGNALING PATHWAY</u>                         | 2.13 | 0.0000 | <b>0.0039</b> |
| C2 Reactome pathway      | <u>REACTOME FC EPSILON RECEPTOR FCERI SIGNALING</u>                              | 2.13 | 0.0000 | <b>0.0040</b> |
| C2 WikiPathways pathway  | <u>WP STEROL REGULATORY ELEMENTBINDING PROTEINS SREBP SIGNALING</u>              | 2.13 | 0.0000 | <b>0.0041</b> |
| C2 Reactome pathway      | <u>REACTOME FORMATION OF TUBULIN FOLDING INTERMEDIATES BY CCT TRIC</u>           | 2.13 | 0.0000 | <b>0.0041</b> |
| C2 Reactome pathway      | <u>REACTOME INTRA GOLGI AND RETROGRADE GOLGI TO ER TRAFFIC</u>                   | 2.12 | 0.0000 | <b>0.0042</b> |
| C2 PID pathway           | <u>PID RAC1 PATHWAY</u>                                                          | 2.11 | 0.0000 | <b>0.0043</b> |
| C5 GO Cellular Component | <u>GOCC FICOLIN 1 RICH GRANULE LUMEN</u>                                         | 2.10 | 0.0000 | <b>0.0043</b> |
| C5 GO Biological Process | <u>GOBP GOLGI TO VACUOLE TRANSPORT</u>                                           | 2.11 | 0.0000 | <b>0.0044</b> |
| Hallmark                 | <u>HALLMARK MYC TARGETS V1</u>                                                   | 2.12 | 0.0000 | <b>0.0044</b> |
| C2 Reactome pathway      | <u>REACTOME NEUTROPHIL DEGRANULATION</u>                                         | 2.09 | 0.0000 | <b>0.0044</b> |
| C5 GO Biological Process | <u>GOBP RETROGRADE VESICLE MEDIATED TRANSPORT GOLGI TO ENDOPLASMIC RETICULUM</u> | 2.10 | 0.0000 | <b>0.0044</b> |
| C2 KEGG pathway          | <u>KEGG NATURAL KILLER CELL MEDIATED CYTOTOXICITY</u>                            | 2.11 | 0.0000 | <b>0.0044</b> |
| C2 Reactome pathway      | <u>REACTOME HOST INTERACTIONS OF HIV FACTORS</u>                                 | 2.10 | 0.0000 | <b>0.0044</b> |
| C2 Reactome pathway      | <u>REACTOME G2 M CHECKPOINTS</u>                                                 | 2.10 | 0.0000 | <b>0.0045</b> |
| C2 Reactome pathway      | <u>REACTOME DEUBIQUITINATION</u>                                                 | 2.10 | 0.0000 | <b>0.0045</b> |
| C2 Reactome pathway      | <u>REACTOME TNF SIGNALING</u>                                                    | 2.09 | 0.0000 | <b>0.0046</b> |

| Group                    | Gene Set Name                                                                                    | NES                      | p      | FDR q         |
|--------------------------|--------------------------------------------------------------------------------------------------|--------------------------|--------|---------------|
|                          |                                                                                                  | post, trained vs control |        |               |
| C5 GO Biological Process | <u>GOBP NEGATIVE REGULATION OF RESPONSE TO ENDOPLASMIC RETICULUM STRESS</u>                      | 2.08                     | 0.0000 | <b>0.0050</b> |
| C5 GO Biological Process | <u>GOBP CELLULAR RESPIRATION</u>                                                                 | 2.08                     | 0.0000 | <b>0.0051</b> |
| C2 Reactome pathway      | <u>REACTOME INTERLEUKIN 3 INTERLEUKIN 5 AND GM-CSF SIGNALING</u>                                 | 2.08                     | 0.0000 | <b>0.0051</b> |
| C2 WikiPathways pathway  | <u>WP MODULATORS OF TCR SIGNALING AND T CELL ACTIVATION</u>                                      | 2.08                     | 0.0000 | <b>0.0052</b> |
| C2 PID pathway           | <u>PID PDGFRB PATHWAY</u>                                                                        | 2.08                     | 0.0000 | <b>0.0052</b> |
| C2 Reactome pathway      | <u>REACTOME CLEC7A DECTIN 1 SIGNALING</u>                                                        | 2.08                     | 0.0000 | <b>0.0052</b> |
| C2 Reactome pathway      | <u>REACTOME COSTIMULATION BY THE CD28 FAMILY</u>                                                 | 2.07                     | 0.0000 | <b>0.0053</b> |
| C2 Reactome pathway      | <u>REACTOME ANTIGEN ACTIVATES B CELL RECEPTOR BCR LEADING TO GENERATION OF SECOND MESSENGERS</u> | 2.07                     | 0.0000 | <b>0.0053</b> |
| C2 PID pathway           | <u>PID FAS PATHWAY</u>                                                                           | 2.07                     | 0.0000 | <b>0.0054</b> |
| C5 GO Cellular Component | <u>GOCC VESICLE TETHERING COMPLEX</u>                                                            | 2.07                     | 0.0000 | <b>0.0054</b> |

|                          |                                                                                                   |      |        |               |
|--------------------------|---------------------------------------------------------------------------------------------------|------|--------|---------------|
| C2 KEGG pathway          | <u>KEGG SPLICEOSOME</u>                                                                           | 2.07 | 0.0000 | <b>0.0054</b> |
| C5 GO Biological Process | <u>GOBP NATURAL KILLER CELL MEDIATED IMMUNITY</u>                                                 | 2.06 | 0.0000 | <b>0.0054</b> |
| C2 WikiPathways pathway  | <u>WP TNFALPHA SIGNALING PATHWAY</u>                                                              | 2.07 | 0.0000 | <b>0.0054</b> |
| C5 GO Biological Process | <u>GOBP MEMBRANE RAFT ORGANIZATION</u>                                                            | 2.06 | 0.0000 | <b>0.0055</b> |
| C2 Reactome pathway      | <u>REACTOME ANTIGEN PROCESSING CROSS PRESENTATION</u>                                             | 2.06 | 0.0000 | <b>0.0055</b> |
| C5 GO Biological Process | <u>GOBP POST GOLGI VESICLE MEDIATED TRANSPORT</u>                                                 | 2.07 | 0.0000 | <b>0.0055</b> |
| C2 KEGG pathway          | <u>KEGG FC GAMMA R MEDIATED PHAGOCYTOSIS</u>                                                      | 2.06 | 0.0000 | <b>0.0055</b> |
| C2 Reactome pathway      | <u>REACTOME REGULATION OF TNFR1 SIGNALING</u>                                                     | 2.06 | 0.0000 | <b>0.0055</b> |
| C5 GO Molecular Function | <u>GOMF PROTEIN N TERMINUS BINDING</u>                                                            | 2.06 | 0.0000 | <b>0.0055</b> |
| C2 PID pathway           | <u>PID IL12 2PATHWAY</u>                                                                          | 2.06 | 0.0000 | <b>0.0056</b> |
| C2 Reactome pathway      | <u>REACTOME COOPERATION OF PREFOLDIN AND TRIC CT IN ACTIN AND TUBULIN FOLDING</u>                 | 2.06 | 0.0000 | <b>0.0056</b> |
| C2 Reactome pathway      | <u>REACTOME PROCESSING OF CAPPED INTRON CONTAINING PRE MRNA</u>                                   | 2.05 | 0.0000 | <b>0.0056</b> |
| C2 Reactome pathway      | <u>REACTOME TRANSCRIPTIONAL ACTIVITY OF SMAD2 SMAD3 SMAD4 HETEROTRIMER</u>                        | 2.05 | 0.0000 | <b>0.0056</b> |
| C2 Reactome pathway      | <u>REACTOME HSP90 CHAPERONE CYCLE FOR STEROID HORMONE RECEPTORS SHR IN THE PRESENCE OF LIGAND</u> | 2.05 | 0.0000 | <b>0.0057</b> |
| C2 Reactome pathway      | <u>REACTOME COPI INDEPENDENT GOLGI TO ER RETROGRADE TRAFFIC</u>                                   | 2.04 | 0.0000 | <b>0.0064</b> |
| C2 WikiPathways pathway  | <u>WP 4HYDROXYTAMOXIFEN DEXAMETHASONE AND RETINOIC ACIDS REGULATION OF P27 EXPRESSION</u>         | 2.04 | 0.0000 | <b>0.0064</b> |
| C2 WikiPathways pathway  | <u>WP TCELL ACTIVATION SARSCOV2</u>                                                               | 2.04 | 0.0000 | <b>0.0064</b> |
| C2 WikiPathways pathway  | <u>WP TCELL ANTIGEN RECEPTOR TCR PATHWAY DURING STAPHYLOCOCCUS AUREUS INFECTION</u>               | 2.04 | 0.0000 | <b>0.0064</b> |
| C2 WikiPathways pathway  | <u>WP INTERACTIONS OF NATURAL KILLER CELLS IN PANCREATIC CANCER</u>                               | 2.04 | 0.0000 | <b>0.0065</b> |
| C2 PID pathway           | <u>PID P38 ALPHA BETA PATHWAY</u>                                                                 | 2.04 | 0.0000 | <b>0.0065</b> |
| C2 PID pathway           | <u>PID CD8 TCR PATHWAY</u>                                                                        | 2.03 | 0.0000 | <b>0.0066</b> |
| C2 PID pathway           | <u>PID PI3KCI PATHWAY</u>                                                                         | 2.03 | 0.0000 | <b>0.0068</b> |
| C2 Reactome pathway      | <u>REACTOME PROTEIN LOCALIZATION</u>                                                              | 2.03 | 0.0000 | <b>0.0069</b> |
| C5 GO Cellular Component | <u>GOCC SPLICEOSOMAL SNRNP COMPLEX</u>                                                            | 2.03 | 0.0000 | <b>0.0071</b> |
| C5 GO Cellular Component | <u>GOCC NUCLEAR PERIPHERY</u>                                                                     | 2.02 | 0.0000 | <b>0.0073</b> |
| C2 KEGG pathway          | <u>KEGG PATHOGENIC ESCHERICHIA COLI INFECTION</u>                                                 | 2.02 | 0.0000 | <b>0.0073</b> |
| C5 GO Biological Process | <u>GOBP NEGATIVE REGULATION OF B CELL ACTIVATION</u>                                              | 2.02 | 0.0000 | <b>0.0075</b> |
| C5 GO Biological Process | <u>GOBP REGULATION OF TRANSLATIONAL INITIATION</u>                                                | 2.02 | 0.0000 | <b>0.0076</b> |
| C2 Reactome pathway      | <u>REACTOME TRANSCRIPTIONAL REGULATION BY RUNX3</u>                                               | 2.01 | 0.0000 | <b>0.0079</b> |

|                          |                                                    |      |        |               |
|--------------------------|----------------------------------------------------|------|--------|---------------|
| C5 GO Biological Process | <u>GOBP_OXIDATIVE_PHOSPHORYLATION</u>              | 2.01 | 0.0000 | <b>0.0079</b> |
| C5 GO Biological Process | <u>GOBP_RETROGRADE_TRANSPORT_ENDOSOME_TO_GOLGI</u> | 2.01 | 0.0000 | <b>0.0081</b> |
| C2 WikiPathways pathway  | <u>WP_PATHOGENIC_ESCHERICHIA_COLI_INFECTION</u>    | 2.01 | 0.0000 | <b>0.0081</b> |

| Group                    | Gene Set Name                                                                     | NES                      | p      | FDR q         |
|--------------------------|-----------------------------------------------------------------------------------|--------------------------|--------|---------------|
|                          |                                                                                   | post, trained vs control |        |               |
| C2 WikiPathways pathway  | <u>WP_IL1_SIGNALING_PATHWAY</u>                                                   | 2.01                     | 0.0000 | <b>0.0083</b> |
| C2 WikiPathways pathway  | <u>WP_MRNA_PROCESSING</u>                                                         | 2.01                     | 0.0000 | <b>0.0084</b> |
| C2 Reactome pathway      | <u>REACTOME_TNFR1_INDUCED_NFKAPPAB_SIGNALING_PATHWAY</u>                          | 2.00                     | 0.0000 | <b>0.0086</b> |
| C2 Reactome pathway      | <u>REACTOME_CLASS_I_MHC_MEDIATED_ANTIGEN_PROCESSING_PRESENTATION</u>              | 2.00                     | 0.0000 | <b>0.0088</b> |
| C5 GO Molecular Function | <u>GOMF_RIBOSOME_BINDING</u>                                                      | 2.00                     | 0.0000 | <b>0.0089</b> |
| C2 Reactome pathway      | <u>REACTOME_G2_M_DNA_DAMAGE_CHECKPOINT</u>                                        | 2.00                     | 0.0000 | <b>0.0089</b> |
| C2 Reactome pathway      | <u>REACTOME_SIGNALING_BY_NOTCH4</u>                                               | 2.00                     | 0.0000 | <b>0.0090</b> |
| C2 WikiPathways pathway  | <u>WP_MICROGLIA_PATHOGEN_PHAGOCYTOSIS_PATHWAY</u>                                 | 1.99                     | 0.0000 | <b>0.0090</b> |
| C5 GO Biological Process | <u>GOBP_PROTEIN_MODIFICATION_BY_SMALL_PROTEIN_REMOVAL</u>                         | 1.99                     | 0.0000 | <b>0.0090</b> |
| C2 Reactome pathway      | <u>REACTOME_TRANSPORT_TO_THE_GOLGI_AND_SUBSEQUENT_MODIFICATION</u>                | 2.00                     | 0.0000 | <b>0.0090</b> |
| C2 BioCarta pathway      | <u>BIOCARTA_PROTEASOME_PATHWAY</u>                                                | 1.99                     | 0.0019 | <b>0.0091</b> |
| C5 GO Biological Process | <u>GOBP_MACROAUTOPHAGY</u>                                                        | 1.99                     | 0.0000 | <b>0.0091</b> |
| C2 WikiPathways pathway  | <u>WP_HEPATITIS_B_INFECTION</u>                                                   | 1.99                     | 0.0000 | <b>0.0091</b> |
| C2 KEGG pathway          | <u>KEGG_TYPE_II_DIABETES_MELLITUS</u>                                             | 1.99                     | 0.0000 | <b>0.0092</b> |
| C2 WikiPathways pathway  | <u>WP_TGFBETA_SIGNALING_PATHWAY</u>                                               | 1.99                     | 0.0000 | <b>0.0092</b> |
| C5 GO Molecular Function | <u>GOMF_SNORNA_BINDING</u>                                                        | 1.99                     | 0.0018 | <b>0.0092</b> |
| C2 BioCarta pathway      | <u>BIOCARTA_HCMV_PATHWAY</u>                                                      | 1.99                     | 0.0000 | <b>0.0092</b> |
| C2 WikiPathways pathway  | <u>WP_THYMIC_STROMAL_LYMPHOPOIETIN_TSLP_SIGNALING_PATHWAY</u>                     | 1.99                     | 0.0000 | <b>0.0092</b> |
| C2 KEGG pathway          | <u>KEGG_FC_EPSILON_RI_SIGNALING_PATHWAY</u>                                       | 1.99                     | 0.0000 | <b>0.0092</b> |
| C5 GO Biological Process | <u>GOBP_INTRINSIC_APOPTOTIC_SIGNALING_PATHWAY_IN_RESPONSE_TO_OXIDATIVE_STRESS</u> | 1.99                     | 0.0000 | <b>0.0093</b> |
| C5 GO Cellular Component | <u>GOCC_MEDIATOR_COMPLEX</u>                                                      | 1.98                     | 0.0000 | <b>0.0094</b> |
| C2 Reactome pathway      | <u>REACTOME_S_PHASE</u>                                                           | 1.98                     | 0.0000 | <b>0.0094</b> |
| C5 GO Biological Process | <u>GOBP_PROTEIN_LOCALIZATION_TO_CHROMOSOME</u>                                    | 1.98                     | 0.0000 | <b>0.0095</b> |
| C5 GO Biological Process | <u>GOBP_ENDOPLASMIC_RETICULUM_TO_GOLGI_VESICLE_MEDIATED_TRANSPORT</u>             | 1.98                     | 0.0000 | <b>0.0096</b> |

|                          |                                                                    |      |        |               |
|--------------------------|--------------------------------------------------------------------|------|--------|---------------|
| C2 Reactome pathway      | <u>REACTOME DOWNSTREAM SIGNALING EVENTS OF B CELL RECEPTOR BCR</u> | 1.98 | 0.0000 | <b>0.0097</b> |
| C2 WikiPathways pathway  | <u>WP IL5 SIGNALING PATHWAY</u>                                    | 1.98 | 0.0000 | <b>0.0097</b> |
| C2 WikiPathways pathway  | <u>WP LEPTIN SIGNALING PATHWAY</u>                                 | 1.98 | 0.0018 | <b>0.0099</b> |
| C5 GO Molecular Function | <u>GOMF RIBONUCLEOPROTEIN COMPLEX BINDING</u>                      | 1.98 | 0.0000 | <b>0.0099</b> |
| C2 BioCarta pathway      | <u>BIOCARTA FCER1 PATHWAY</u>                                      | 1.97 | 0.0000 | <b>0.0100</b> |
| C2 WikiPathways pathway  | <u>WP TCELL RECEPTOR TCR SIGNALING PATHWAY</u>                     | 1.97 | 0.0000 | <b>0.0100</b> |
| C2 WikiPathways pathway  | <u>WP TYROBP CAUSAL NETWORK IN MICROGLIA</u>                       | 1.97 | 0.0000 | <b>0.0100</b> |
| C5 GO Molecular Function | <u>GOMF SIGNAL SEQUENCE BINDING</u>                                | 1.97 | 0.0000 | <b>0.0100</b> |
| C2 Reactome pathway      | <u>REACTOME FCERI MEDIATED NF KB ACTIVATION</u>                    | 1.97 | 0.0000 | <b>0.0101</b> |
| C2 Reactome pathway      | <u>REACTOME COPI MEDIATED ANTEROGRADE TRANSPORT</u>                | 1.97 | 0.0000 | <b>0.0102</b> |
| C2 WikiPathways pathway  | <u>WP PROLACTIN SIGNALING PATHWAY</u>                              | 1.97 | 0.0000 | <b>0.0103</b> |
| C5 GO Molecular Function | <u>GOMF ISOPEPTIDASE ACTIVITY</u>                                  | 1.97 | 0.0000 | <b>0.0103</b> |
| C2 Reactome pathway      | <u>REACTOME CRISTAE FORMATION</u>                                  | 1.97 | 0.0000 | <b>0.0103</b> |
| C2 Reactome pathway      | <u>REACTOME TRANSCRIPTIONAL REGULATION BY RUNX1</u>                | 1.97 | 0.0000 | <b>0.0103</b> |
| C2 Reactome pathway      | <u>REACTOME MYD88 INDEPENDENT TLR4 CASCADE</u>                     | 1.97 | 0.0000 | <b>0.0103</b> |
| C2 Reactome pathway      | <u>REACTOME INFLAMMASOMES</u>                                      | 1.96 | 0.0000 | <b>0.0104</b> |
| C5 GO Molecular Function | <u>GOMF INOSITOL PHOSPHATE PHOSPHATASE ACTIVITY</u>                | 1.96 | 0.0000 | <b>0.0104</b> |
| C5 GO Biological Process | <u>GOBP REGULATION OF RESPONSE TO ENDOPLASMIC RETICULUM STRESS</u> | 1.96 | 0.0000 | <b>0.0104</b> |

| Group                    | Gene Set Name                                                            | NES                      | p      | FDR q         |
|--------------------------|--------------------------------------------------------------------------|--------------------------|--------|---------------|
|                          |                                                                          | post, trained vs control |        |               |
| C2 Reactome pathway      | <u>REACTOME DOWNREGULATION OF SMAD2 3 SMAD4 TRANSCRIPTIONAL ACTIVITY</u> | 1.96                     | 0.0000 | <b>0.0105</b> |
| C5 GO Biological Process | <u>GOBP ACTIVATION OF IMMUNE RESPONSE</u>                                | 1.96                     | 0.0000 | <b>0.0107</b> |
| C2 BioCarta pathway      | <u>BIOCARTA STRESS PATHWAY</u>                                           | 1.96                     | 0.0000 | <b>0.0108</b> |
| C2 Reactome pathway      | <u>REACTOME DEATH RECEPTOR SIGNALLING</u>                                | 1.95                     | 0.0000 | <b>0.0110</b> |
| C5 GO Molecular Function | <u>GOMF NUCLEAR RECEPTOR COACTIVATOR ACTIVITY</u>                        | 1.95                     | 0.0000 | <b>0.0110</b> |
| C2 Reactome pathway      | <u>REACTOME FLT3 SIGNALING</u>                                           | 1.95                     | 0.0000 | <b>0.0110</b> |
| C5 GO Biological Process | <u>GOBP T CELL ACTIVATION</u>                                            | 1.95                     | 0.0000 | <b>0.0111</b> |
| Hallmark                 | <u>HALLMARK PI3K AKT MTOR SIGNALING</u>                                  | 1.96                     | 0.0000 | <b>0.0111</b> |
| C5 GO Molecular Function | <u>GOMF TRANSLATION ELONGATION FACTOR ACTIVITY</u>                       | 1.95                     | 0.0000 | <b>0.0111</b> |
| C2 WikiPathways pathway  | <u>WP GASTRIC CANCER NETWORK 2</u>                                       | 1.95                     | 0.0000 | <b>0.0111</b> |
| C5 GO Biological Process | <u>GOBP LEUKOCYTE DEGRANULATION</u>                                      | 1.95                     | 0.0000 | <b>0.0111</b> |
| C5 GO Biological Process | <u>GOBP NUCLEOLAR LARGE RRNA TRANSCRIPTION BY RNA POLYMERASE I</u>       | 1.95                     | 0.0000 | <b>0.0111</b> |

|                          |                                                                              |      |        |               |
|--------------------------|------------------------------------------------------------------------------|------|--------|---------------|
| C5 GO Biological Process | <u>GOBP MEMBRANE LIPID CATABOLIC PROCESS</u>                                 | 1.95 | 0.0000 | <b>0.0112</b> |
| C2 Reactome pathway      | <u>REACTOME METALLOPROTEASE DUBS</u>                                         | 1.95 | 0.0000 | <b>0.0112</b> |
| C5 GO Biological Process | <u>GOBP LYMPHOCYTE COSTIMULATION</u>                                         | 1.95 | 0.0019 | <b>0.0112</b> |
| C2 Reactome pathway      | <u>REACTOME ASPARAGINE N LINKED GLYCOSYLATION</u>                            | 1.95 | 0.0000 | <b>0.0113</b> |
| C2 KEGG pathway          | <u>KEGG CHRONIC MYELOID LEUKEMIA</u>                                         | 1.95 | 0.0000 | <b>0.0113</b> |
| C2 Reactome pathway      | <u>REACTOME TRANSCRIPTIONAL REGULATION BY TP53</u>                           | 1.95 | 0.0000 | <b>0.0114</b> |
| C5 GO Molecular Function | <u>GOMF MANNOSIDASE ACTIVITY</u>                                             | 1.95 | 0.0019 | <b>0.0114</b> |
| C2 WikiPathways pathway  | <u>WP TOLLLIKE RECEPTOR SIGNALING PATHWAY</u>                                | 1.95 | 0.0000 | <b>0.0114</b> |
| C5 GO Biological Process | <u>GOBP PROTEIN K11 LINKED UBIQUITINATION</u>                                | 1.95 | 0.0000 | <b>0.0115</b> |
| C5 GO Biological Process | <u>GOBP LEUKOCYTE MEDIATED CYTOTOXICITY</u>                                  | 1.94 | 0.0000 | <b>0.0116</b> |
| C2 Reactome pathway      | <u>REACTOME NEGATIVE REGULATION OF MAPK PATHWAY</u>                          | 1.94 | 0.0000 | <b>0.0116</b> |
| C5 GO Biological Process | <u>GOBP REGULATION OF B CELL DIFFERENTIATION</u>                             | 1.94 | 0.0019 | <b>0.0116</b> |
| C5 GO Molecular Function | <u>GOMF UBIQUITIN LIKE PROTEIN BINDING</u>                                   | 1.94 | 0.0000 | <b>0.0117</b> |
| C5 GO Biological Process | <u>GOBP PROTEIN LOCALIZATION TO ENDOSOME</u>                                 | 1.94 | 0.0000 | <b>0.0118</b> |
| C5 GO Cellular Component | <u>GOCC MITOCHONDRIAL PROTEIN CONTAINING COMPLEX</u>                         | 1.94 | 0.0000 | <b>0.0119</b> |
| C2 Reactome pathway      | <u>REACTOME MRNA SPLICING</u>                                                | 1.94 | 0.0000 | <b>0.0119</b> |
| C2 Reactome pathway      | <u>REACTOME RHOA GTPASE CYCLE</u>                                            | 1.94 | 0.0000 | <b>0.0119</b> |
| C5 GO Biological Process | <u>GOBP ALPHA BETA T CELL PROLIFERATION</u>                                  | 1.94 | 0.0000 | <b>0.0119</b> |
| C5 GO Biological Process | <u>GOBP TRANSLATIONAL INITIATION</u>                                         | 1.94 | 0.0000 | <b>0.0120</b> |
| C2 Reactome pathway      | <u>REACTOME COPII MEDIATED VESICLE TRANSPORT</u>                             | 1.93 | 0.0000 | <b>0.0121</b> |
| C2 Reactome pathway      | <u>REACTOME RNA POLYMERASE II TRANSCRIBES SNRNA GENES</u>                    | 1.93 | 0.0000 | <b>0.0121</b> |
| C5 GO Biological Process | <u>GOBP ORGANELLE DISASSEMBLY</u>                                            | 1.93 | 0.0000 | <b>0.0121</b> |
| C5 GO Biological Process | <u>GOBP CYTOSOLIC TRANSPORT</u>                                              | 1.94 | 0.0000 | <b>0.0121</b> |
| C5 GO Biological Process | <u>GOBP MITOPHAGY</u>                                                        | 1.93 | 0.0018 | <b>0.0121</b> |
| C2 KEGG pathway          | <u>KEGG NEUROTROPHIN SIGNALING PATHWAY</u>                                   | 1.93 | 0.0000 | <b>0.0121</b> |
| C2 PID pathway           | <u>PID IL6 7 PATHWAY</u>                                                     | 1.93 | 0.0000 | <b>0.0121</b> |
| C5 GO Cellular Component | <u>GOCC INTRINSIC COMPONENT OF ENDOPLASMIC RETICULUM MEMBRANE</u>            | 1.94 | 0.0017 | <b>0.0121</b> |
| C2 Reactome pathway      | <u>REACTOME SWITCHING OF ORIGINS TO A POST REPLICATIVE STATE</u>             | 1.93 | 0.0000 | <b>0.0121</b> |
| C5 GO Biological Process | <u>GOBP POSITIVE REGULATION OF TELOMERASE RNA LOCALIZATION TO CAJAL BODY</u> | 1.93 | 0.0038 | <b>0.0121</b> |
| C2 WikiPathways pathway  | <u>WP ATM SIGNALING PATHWAY</u>                                              | 1.94 | 0.0017 | <b>0.0121</b> |

| Group | Gene Set Name | NES | p | FDR q |
|-------|---------------|-----|---|-------|
|-------|---------------|-----|---|-------|



|                          |                                                                                     | post, trained vs control |        |               |
|--------------------------|-------------------------------------------------------------------------------------|--------------------------|--------|---------------|
| C2 WikiPathways pathway  | <u>WP INTERFERON TYPE I SIGNALING PATHWAYS</u>                                      | 1.93                     | 0.0000 | <b>0.0121</b> |
| C2 Reactome pathway      | <u>REACTOME OVARIAN TUMOR DOMAIN PROTEASES</u>                                      | 1.93                     | 0.0000 | <b>0.0126</b> |
| C5 GO Biological Process | <u>GOBP INTRACELLULAR PROTEIN TRANSMEMBRANE TRANSPORT</u>                           | 1.93                     | 0.0036 | <b>0.0126</b> |
| C2 Reactome pathway      | <u>REACTOME SMAD2 SMAD3 SMAD4 HETEROTRIMER REGULATES TRANSCRIPTION</u>              | 1.93                     | 0.0000 | <b>0.0126</b> |
| C2 PID pathway           | <u>PID FCER1 PATHWAY</u>                                                            | 1.92                     | 0.0000 | <b>0.0128</b> |
| C2 PID pathway           | <u>PID P53 REGULATION PATHWAY</u>                                                   | 1.92                     | 0.0000 | <b>0.0128</b> |
| C2 Reactome pathway      | <u>REACTOME TRANSCRIPTION OF THE HIV GENOME</u>                                     | 1.92                     | 0.0000 | <b>0.0128</b> |
| C2 WikiPathways pathway  | <u>WP ELECTRON TRANSPORT CHAIN OXPHOS SYSTEM IN MITOCHONDRIA</u>                    | 1.92                     | 0.0000 | <b>0.0128</b> |
| C2 Reactome pathway      | <u>REACTOME CTLA4 INHIBITORY SIGNALING</u>                                          | 1.92                     | 0.0000 | <b>0.0129</b> |
| C5 GO Cellular Component | <u>GOCC AZUROPHIL GRANULE LUMEN</u>                                                 | 1.92                     | 0.0000 | <b>0.0129</b> |
| C5 GO Molecular Function | <u>GOMF MODIFICATION DEPENDENT PROTEIN BINDING</u>                                  | 1.92                     | 0.0000 | <b>0.0129</b> |
| C2 WikiPathways pathway  | <u>WP MITOCHONDRIAL IMMUNE RESPONSE TO SARS COV2</u>                                | 1.92                     | 0.0000 | <b>0.0129</b> |
| C2 Reactome pathway      | <u>REACTOME PTEN REGULATION</u>                                                     | 1.92                     | 0.0000 | <b>0.0129</b> |
| C5 GO Biological Process | <u>GOBP POSITIVE REGULATION OF OXIDATIVE STRESS INDUCED CELL DEATH</u>              | 1.92                     | 0.0018 | <b>0.0129</b> |
| C2 Reactome pathway      | <u>REACTOME PARASITE INFECTION</u>                                                  | 1.92                     | 0.0000 | <b>0.0129</b> |
| C2 PID pathway           | <u>PID IL2 STAT5 PATHWAY</u>                                                        | 1.92                     | 0.0019 | <b>0.0129</b> |
| C2 PID pathway           | <u>PID INSULIN GLUCOSE PATHWAY</u>                                                  | 1.92                     | 0.0000 | <b>0.0129</b> |
| C2 PID pathway           | <u>PID IL2 1PATHWAY</u>                                                             | 1.92                     | 0.0000 | <b>0.0130</b> |
| C5 GO Biological Process | <u>GOBP REGULATION OF ALPHA BETA T CELL ACTIVATION</u>                              | 1.91                     | 0.0000 | <b>0.0130</b> |
| C5 GO Biological Process | <u>GOBP REGULATION OF ANTIGEN RECEPTOR MEDIATED SIGNALING PATHWAY</u>               | 1.92                     | 0.0000 | <b>0.0130</b> |
| C5 GO Biological Process | <u>GOBP GOLGI ORGANIZATION</u>                                                      | 1.91                     | 0.0000 | <b>0.0130</b> |
| C2 Reactome pathway      | <u>REACTOME SIGNALING BY BRAF AND RAF1 FUSIONS</u>                                  | 1.91                     | 0.0000 | <b>0.0130</b> |
| C2 Reactome pathway      | <u>REACTOME REGULATION OF MRNA STABILITY BY PROTEINS THAT BIND AU RICH ELEMENTS</u> | 1.92                     | 0.0000 | <b>0.0130</b> |
| C2 Reactome pathway      | <u>REACTOME CYTOSOLIC SENSORS OF PATHOGEN ASSOCIATED DNA</u>                        | 1.92                     | 0.0000 | <b>0.0130</b> |
| C2 Reactome pathway      | <u>REACTOME FCGAMMA RECEPTOR FCGR DEPENDENT PHAGOCYTOSIS</u>                        | 1.92                     | 0.0000 | <b>0.0131</b> |
| C5 GO Cellular Component | <u>GOCC INNER MITOCHONDRIAL MEMBRANE PROTEIN COMPLEX</u>                            | 1.91                     | 0.0000 | <b>0.0131</b> |
| C5 GO Cellular Component | <u>GOCC SPLICEOSOMAL COMPLEX</u>                                                    | 1.91                     | 0.0000 | <b>0.0131</b> |
| C2 Reactome pathway      | <u>REACTOME TOLL LIKE RECEPTOR 9 TLR9 CASCADE</u>                                   | 1.92                     | 0.0000 | <b>0.0131</b> |

|                          |                                                                                                               |      |        |               |
|--------------------------|---------------------------------------------------------------------------------------------------------------|------|--------|---------------|
| C2 Reactome pathway      | <u>REACTOME DEGRADATION OF BETA CATENIN BY THE DESTRUCTION COMPLEX</u>                                        | 1.91 | 0.0000 | <b>0.0131</b> |
| C2 Reactome pathway      | <u>REACTOME SIGNALING BY CTNNB1 PHOSPHO SITE MUTANTS</u>                                                      | 1.91 | 0.0019 | <b>0.0131</b> |
| C2 WikiPathways pathway  | <u>WP DNA IRDAMAGE AND CELLULAR RESPONSE VIA ATR</u>                                                          | 1.91 | 0.0000 | <b>0.0131</b> |
| C2 Reactome pathway      | <u>REACTOME CELL CYCLE CHECKPOINTS</u>                                                                        | 1.91 | 0.0000 | <b>0.0131</b> |
| C5 GO Biological Process | <u>GOBP AEROBIC RESPIRATION</u>                                                                               | 1.91 | 0.0000 | <b>0.0131</b> |
| C5 GO Cellular Component | <u>GOCC U2 TYPE SPLICEOSOMAL COMPLEX</u>                                                                      | 1.91 | 0.0000 | <b>0.0131</b> |
| C2 KEGG pathway          | <u>KEGG INSULIN SIGNALING PATHWAY</u>                                                                         | 1.91 | 0.0000 | <b>0.0132</b> |
| C2 Reactome pathway      | <u>REACTOME ABERRANT REGULATION OF MITOTIC EXIT IN CANCER DUE TO RB1 DEFECTS</u>                              | 1.91 | 0.0019 | <b>0.0132</b> |
| C5 GO Cellular Component | <u>GOCC LUMENAL SIDE OF MEMBRANE</u>                                                                          | 1.91 | 0.0000 | <b>0.0133</b> |
| C2 WikiPathways pathway  | <u>WP TNFRELATED WEAK INDUCER OF APOPTOSIS TWAK SIGNALING PATHWAY</u>                                         | 1.91 | 0.0000 | <b>0.0135</b> |
| C5 GO Biological Process | <u>GOBP FATTY ACID BETA OXIDATION</u>                                                                         | 1.90 | 0.0000 | <b>0.0140</b> |
| C2 Reactome pathway      | <u>REACTOME PEROXISOMAL PROTEIN IMPORT</u>                                                                    | 1.90 | 0.0000 | <b>0.0141</b> |
| C2 Reactome pathway      | <u>REACTOME RUNX1 REGULATES GENES INVOLVED IN MEGAKARYOCYTE DIFFERENTIATION AND PLATELET FUNCTION</u>         | 1.90 | 0.0000 | <b>0.0141</b> |
| C5 GO Biological Process | <u>GOBP NEGATIVE REGULATION OF ENDOPLASMIC RETICULUM STRESS INDUCED INTRINSIC APOPTOTIC SIGNALING PATHWAY</u> | 1.90 | 0.0000 | <b>0.0142</b> |

| Group                    | Gene Set Name                                                                             | NES                      | p      | FDR q         |
|--------------------------|-------------------------------------------------------------------------------------------|--------------------------|--------|---------------|
|                          |                                                                                           | post, trained vs control |        |               |
| C5 GO Biological Process | <u>GOBP PROTEASOMAL PROTEIN CATABOLIC PROCESS</u>                                         | 1.90                     | 0.0000 | <b>0.0142</b> |
| C2 Reactome pathway      | <u>REACTOME TOLL LIKE RECEPTOR TLR1 TLR2 CASCADE</u>                                      | 1.90                     | 0.0000 | <b>0.0143</b> |
| C2 Reactome pathway      | <u>REACTOME DEFECTIVE INTRINSIC PATHWAY FOR APOPTOSIS</u>                                 | 1.90                     | 0.0000 | <b>0.0143</b> |
| C5 GO Cellular Component | <u>GOCC SITE OF DOUBLE STRAND BREAK</u>                                                   | 1.90                     | 0.0000 | <b>0.0149</b> |
| C5 GO Biological Process | <u>GOBP PROTEIN K63 LINKED DEUBIQUITINATION</u>                                           | 1.89                     | 0.0017 | <b>0.0149</b> |
| C2 KEGG pathway          | <u>KEGG PANCREATIC CANCER</u>                                                             | 1.89                     | 0.0000 | <b>0.0150</b> |
| C5 GO Biological Process | <u>GOBP POSITIVE REGULATION OF ESTABLISHMENT OF PROTEIN LOCALIZATION TO MITOCHONDRION</u> | 1.89                     | 0.0019 | <b>0.0150</b> |
| C5 GO Molecular Function | <u>GOMF RNA POLYMERASE CORE ENZYME BINDING</u>                                            | 1.89                     | 0.0000 | <b>0.0150</b> |
| C2 Reactome pathway      | <u>REACTOME REGULATION OF RUNX3 EXPRESSION AND ACTIVITY</u>                               | 1.89                     | 0.0000 | <b>0.0151</b> |
| C2 WikiPathways pathway  | <u>WP CARDIAC HYPERTROPHIC RESPONSE</u>                                                   | 1.89                     | 0.0017 | <b>0.0151</b> |
| C5 GO Biological Process | <u>GOBP REGULATION OF HISTONE METHYLATION</u>                                             | 1.89                     | 0.0000 | <b>0.0151</b> |

|                          |                                                                                                                                  |      |        |               |
|--------------------------|----------------------------------------------------------------------------------------------------------------------------------|------|--------|---------------|
| C2 Reactome pathway      | <u>REACTOME ONCOGENIC MAPK SIGNALING</u>                                                                                         | 1.89 | 0.0000 | <b>0.0151</b> |
| C2 Reactome pathway      | <u>REACTOME REGULATION OF SIGNALING BY CBL</u>                                                                                   | 1.89 | 0.0000 | <b>0.0152</b> |
| C2 Reactome pathway      | <u>REACTOME RESPIRATORY ELECTRON TRANSPORT ATP SYNTHESIS BY CHEMIOSMOTIC COUPLING AND HEAT PRODUCTION BY UNCOUPLING PROTEINS</u> | 1.89 | 0.0000 | <b>0.0153</b> |
| C2 WikiPathways pathway  | <u>WP PROTEASOME DEGRADATION</u>                                                                                                 | 1.89 | 0.0000 | <b>0.0154</b> |
| C2 Reactome pathway      | <u>REACTOME INTERLEUKIN 1 SIGNALING</u>                                                                                          | 1.89 | 0.0000 | <b>0.0154</b> |
| C2 Reactome pathway      | <u>REACTOME SYNTHESIS OF DNA</u>                                                                                                 | 1.89 | 0.0000 | <b>0.0155</b> |
| C2 WikiPathways pathway  | <u>WP IL2 SIGNALING PATHWAY</u>                                                                                                  | 1.89 | 0.0000 | <b>0.0155</b> |
| C5 GO Cellular Component | <u>GOCC MAGNESIUM DEPENDENT PROTEIN SERINE THREONINE PHOSPHATASE COMPLEX</u>                                                     | 1.89 | 0.0038 | <b>0.0156</b> |
| C2 KEGG pathway          | <u>KEGG ANTIGEN PROCESSING AND PRESENTATION</u>                                                                                  | 1.89 | 0.0000 | <b>0.0156</b> |
| C5 GO Biological Process | <u>GOBP VACUOLAR TRANSPORT</u>                                                                                                   | 1.89 | 0.0000 | <b>0.0156</b> |
| C2 PID pathway           | <u>PID CERAMIDE PATHWAY</u>                                                                                                      | 1.88 | 0.0000 | <b>0.0158</b> |
| C5 GO Biological Process | <u>GOBP REGULATION OF LYMPHOCYTE ACTIVATION</u>                                                                                  | 1.88 | 0.0000 | <b>0.0158</b> |
| C5 GO Biological Process | <u>GOBP ESTABLISHMENT OF PROTEIN LOCALIZATION TO ORGANELLE</u>                                                                   | 1.88 | 0.0000 | <b>0.0159</b> |
| C2 WikiPathways pathway  | <u>WP NAD METABOLISM IN ONCOGENEINDUCED SENESCENCE AND MITOCHONDRIAL DYSFUNCTIONASSOCIATED SENESCENCE</u>                        | 1.88 | 0.0000 | <b>0.0159</b> |
| C5 GO Biological Process | <u>GOBP B CELL ACTIVATION</u>                                                                                                    | 1.88 | 0.0000 | <b>0.0159</b> |
| C5 GO Molecular Function | <u>GOMF HEAT SHOCK PROTEIN BINDING</u>                                                                                           | 1.88 | 0.0000 | <b>0.0159</b> |
| C2 Reactome pathway      | <u>REACTOME UB SPECIFIC PROCESSING PROTEASES</u>                                                                                 | 1.88 | 0.0000 | <b>0.0159</b> |
| C5 GO Cellular Component | <u>GOCC PHOSPHATASE COMPLEX</u>                                                                                                  | 1.88 | 0.0000 | <b>0.0161</b> |
| C5 GO Molecular Function | <u>GOMF PHOSPHATASE BINDING</u>                                                                                                  | 1.88 | 0.0000 | <b>0.0162</b> |
| C2 Reactome pathway      | <u>REACTOME TELOMERE EXTENSION BY TELOMERASE</u>                                                                                 | 1.88 | 0.0000 | <b>0.0162</b> |
| C2 Reactome pathway      | <u>REACTOME INTEGRIN SIGNALING</u>                                                                                               | 1.88 | 0.0019 | <b>0.0163</b> |
| C5 GO Molecular Function | <u>GOMF PROTEIN PHOSPHORYLATED AMINO ACID BINDING</u>                                                                            | 1.88 | 0.0000 | <b>0.0166</b> |
| C5 GO Cellular Component | <u>GOCC SITE OF DNA DAMAGE</u>                                                                                                   | 1.88 | 0.0000 | <b>0.0166</b> |
| C5 GO Cellular Component | <u>GOCC VESICLE LUMEN</u>                                                                                                        | 1.88 | 0.0000 | <b>0.0167</b> |
| C5 GO Biological Process | <u>GOBP POSITIVE REGULATION OF HISTONE MODIFICATION</u>                                                                          | 1.87 | 0.0000 | <b>0.0169</b> |
| C5 GO Cellular Component | <u>GOCC CHAPERONE COMPLEX</u>                                                                                                    | 1.87 | 0.0000 | <b>0.0169</b> |
| C5 GO Cellular Component | <u>GOCC OUTER MITOCHONDRIAL MEMBRANE PROTEIN COMPLEX</u>                                                                         | 1.87 | 0.0000 | <b>0.0169</b> |
| C2 BioCarta pathway      | <u>BIOCARTA BCR PATHWAY</u>                                                                                                      | 1.87 | 0.0000 | <b>0.0169</b> |
| C2 Reactome pathway      | <u>REACTOME HIV LIFE CYCLE</u>                                                                                                   | 1.87 | 0.0000 | <b>0.0169</b> |

|                          |                                                                                                  |      |        |               |
|--------------------------|--------------------------------------------------------------------------------------------------|------|--------|---------------|
| C5 GO Biological Process | <u>GOBP REGULATION OF PROTEASOMAL PROTEIN CATABOLIC PROCESS</u>                                  | 1.87 | 0.0000 | <b>0.0169</b> |
| C2 Reactome pathway      | <u>REACTOME DISEASES OF SIGNAL TRANSDUCTION BY GROWTH FACTOR RECEPTORS AND SECOND MESSENGERS</u> | 1.87 | 0.0000 | <b>0.0169</b> |

| Group                    | Gene Set Name                                                                    | NES                      | p      | FDR q         |
|--------------------------|----------------------------------------------------------------------------------|--------------------------|--------|---------------|
|                          |                                                                                  | post, trained vs control |        |               |
| C2 WikiPathways pathway  | <u>WP COPPER HOMEOSTASIS</u>                                                     | 1.87                     | 0.0000 | <b>0.0170</b> |
| C5 GO Molecular Function | <u>GOMF PHOSPHOLIPID TRANSFER ACTIVITY</u>                                       | 1.87                     | 0.0056 | <b>0.0170</b> |
| C2 WikiPathways pathway  | <u>WP TRANSLATION INHIBITORS IN CHRONICALLY ACTIVATED PDGFRA CELLS</u>           | 1.87                     | 0.0000 | <b>0.0171</b> |
| C2 Reactome pathway      | <u>REACTOME AUTOPHAGY</u>                                                        | 1.87                     | 0.0000 | <b>0.0174</b> |
| C5 GO Biological Process | <u>GOBP RNA SPLICING VIA TRANSESTERIFICATION REACTIONS</u>                       | 1.87                     | 0.0000 | <b>0.0174</b> |
| C2 Reactome pathway      | <u>REACTOME UNFOLDED PROTEIN RESPONSE UPR</u>                                    | 1.87                     | 0.0000 | <b>0.0174</b> |
| C2 KEGG pathway          | <u>KEGG T CELL RECEPTOR SIGNALING PATHWAY</u>                                    | 1.87                     | 0.0000 | <b>0.0175</b> |
| C2 Reactome pathway      | <u>REACTOME ASSOCIATION OF TRIC CCT WITH TARGET PROTEINS DURING BIOSYNTHESIS</u> | 1.87                     | 0.0000 | <b>0.0176</b> |
| C2 Reactome pathway      | <u>REACTOME RRNA MODIFICATION IN THE NUCLEUS AND CYTOSOL</u>                     | 1.87                     | 0.0000 | <b>0.0176</b> |
| C2 Reactome pathway      | <u>REACTOME DNA REPLICATION</u>                                                  | 1.87                     | 0.0000 | <b>0.0176</b> |
| C2 Reactome pathway      | <u>REACTOME INTERLEUKIN 1 FAMILY SIGNALING</u>                                   | 1.86                     | 0.0000 | <b>0.0177</b> |
| C2 Reactome pathway      | <u>REACTOME UCH PROTEINASES</u>                                                  | 1.86                     | 0.0000 | <b>0.0177</b> |
| C5 GO Biological Process | <u>GOBP CHAPERONE MEDIATED PROTEIN FOLDING</u>                                   | 1.86                     | 0.0036 | <b>0.0177</b> |
| C2 PID pathway           | <u>PID VEGFR1 2 PATHWAY</u>                                                      | 1.86                     | 0.0000 | <b>0.0177</b> |
| C2 WikiPathways pathway  | <u>WP DNA IRDOUBLE STRAND BREAKS AND CELLULAR RESPONSE VIA ATM</u>               | 1.86                     | 0.0035 | <b>0.0178</b> |
| C2 WikiPathways pathway  | <u>WP REGUCALCIN IN PROXIMAL TUBULE EPITHELIAL KIDNEY CELLS</u>                  | 1.86                     | 0.0019 | <b>0.0178</b> |
| C2 KEGG pathway          | <u>KEGG PROTEIN EXPORT</u>                                                       | 1.86                     | 0.0000 | <b>0.0179</b> |
| C2 WikiPathways pathway  | <u>WP TCA CYCLE AKA KREBS OR CITRIC ACID CYCLE</u>                               | 1.86                     | 0.0018 | <b>0.0179</b> |
| C2 Reactome pathway      | <u>REACTOME THE CITRIC ACID TCA CYCLE AND RESPIRATORY ELECTRON TRANSPORT</u>     | 1.86                     | 0.0000 | <b>0.0179</b> |
| C2 KEGG pathway          | <u>KEGG PARKINSONS DISEASE</u>                                                   | 1.86                     | 0.0000 | <b>0.0179</b> |
| C5 GO Biological Process | <u>GOBP RNA SPLICING</u>                                                         | 1.86                     | 0.0000 | <b>0.0180</b> |
| C2 KEGG pathway          | <u>KEGG UBIQUITIN MEDIATED PROTEOLYSIS</u>                                       | 1.86                     | 0.0000 | <b>0.0180</b> |
| C5 GO Biological Process | <u>GOBP PROTEIN TRANSMEMBRANE TRANSPORT</u>                                      | 1.86                     | 0.0000 | <b>0.0180</b> |
| C2 BioCarta pathway      | <u>BIOCARTA NTHI PATHWAY</u>                                                     | 1.86                     | 0.0018 | <b>0.0180</b> |
| C5 GO Molecular Function | <u>GOMF UNFOLDED PROTEIN BINDING</u>                                             | 1.86                     | 0.0000 | <b>0.0182</b> |

|                          |                                                                    |      |        |               |
|--------------------------|--------------------------------------------------------------------|------|--------|---------------|
| C2 Reactome pathway      | <u>REACTOME PROTEIN FOLDING</u>                                    | 1.86 | 0.0017 | <b>0.0182</b> |
| C5 GO Biological Process | <u>GOBP REGULATION OF LEUKOCYTE DEGRANULATION</u>                  | 1.86 | 0.0037 | <b>0.0183</b> |
| C5 GO Biological Process | <u>GOBP RESPIRATORY ELECTRON TRANSPORT CHAIN</u>                   | 1.86 | 0.0000 | <b>0.0183</b> |
| C5 GO Biological Process | <u>GOBP GRANULOCYTE ACTIVATION</u>                                 | 1.86 | 0.0000 | <b>0.0184</b> |
| C5 GO Biological Process | <u>GOBP FC EPSILON RECEPTOR SIGNALING PATHWAY</u>                  | 1.86 | 0.0019 | <b>0.0184</b> |
| C2 Reactome pathway      | <u>REACTOME MAPK6 MAPK4 SIGNALING</u>                              | 1.86 | 0.0000 | <b>0.0184</b> |
| C5 GO Cellular Component | <u>GOCC VESICLE COAT</u>                                           | 1.85 | 0.0000 | <b>0.0185</b> |
| C5 GO Biological Process | <u>GOBP ANTIGEN PROCESSING AND PRESENTATION</u>                    | 1.85 | 0.0000 | <b>0.0189</b> |
| C5 GO Cellular Component | <u>GOCC PRESPLICEOSOME</u>                                         | 1.85 | 0.0073 | <b>0.0189</b> |
| C5 GO Biological Process | <u>GOBP FC RECEPTOR MEDIATED STIMULATORY SIGNALING PATHWAY</u>     | 1.85 | 0.0054 | <b>0.0192</b> |
| C5 GO Cellular Component | <u>GOCC VACUOLAR MEMBRANE</u>                                      | 1.85 | 0.0000 | <b>0.0193</b> |
| C5 GO Cellular Component | <u>GOCC SM LIKE PROTEIN FAMILY COMPLEX</u>                         | 1.85 | 0.0000 | <b>0.0193</b> |
| C5 GO Biological Process | <u>GOBP ANTIGEN PROCESSING AND PRESENTATION OF PEPTIDE ANTIGEN</u> | 1.85 | 0.0018 | <b>0.0193</b> |
| C5 GO Biological Process | <u>GOBP TOLL LIKE RECEPTOR SIGNALING PATHWAY</u>                   | 1.85 | 0.0000 | <b>0.0193</b> |
| C5 GO Biological Process | <u>GOBP REGULATION OF PROTEIN DEPHOSPHORYLATION</u>                | 1.85 | 0.0000 | <b>0.0193</b> |
| C5 GO Cellular Component | <u>GOCC CUL4 RING E3 UBIQUITIN LIGASE COMPLEX</u>                  | 1.85 | 0.0000 | <b>0.0193</b> |
| C5 GO Biological Process | <u>GOBP CELLULAR RESPONSE TO DSRNA</u>                             | 1.85 | 0.0000 | <b>0.0193</b> |

| Group                    | Gene Set Name                                                                 | NES                      | p      | FDR q         |
|--------------------------|-------------------------------------------------------------------------------|--------------------------|--------|---------------|
|                          |                                                                               | post, trained vs control |        |               |
| C2 Reactome pathway      | <u>REACTOME ANTIGEN PROCESSING UBIQUITINATION PROTEASOME DEGRADATION</u>      | 1.84                     | 0.0000 | <b>0.0194</b> |
| C5 GO Molecular Function | <u>GOMF RNA POLYMERASE BINDING</u>                                            | 1.85                     | 0.0000 | <b>0.0194</b> |
| C5 GO Biological Process | <u>GOBP B CELL DIFFERENTIATION</u>                                            | 1.85                     | 0.0000 | <b>0.0194</b> |
| C2 WikiPathways pathway  | <u>WP VEGFAVEGFR2 SIGNALING PATHWAY</u>                                       | 1.85                     | 0.0000 | <b>0.0194</b> |
| C2 Reactome pathway      | <u>REACTOME THE ROLE OF NEF IN HIV 1 REPLICATION AND DISEASE PATHOGENESIS</u> | 1.85                     | 0.0039 | <b>0.0195</b> |
| C5 GO Biological Process | <u>GOBP VIRAL RNA GENOME REPLICATION</u>                                      | 1.85                     | 0.0018 | <b>0.0195</b> |
| C2 Reactome pathway      | <u>REACTOME RAB REGULATION OF TRAFFICKING</u>                                 | 1.84                     | 0.0000 | <b>0.0197</b> |
| C5 GO Biological Process | <u>GOBP POSITIVE REGULATION OF PROTEIN DEPHOSPHORYLATION</u>                  | 1.84                     | 0.0018 | <b>0.0197</b> |
| C5 GO Biological Process | <u>GOBP TRANSPORT OF VIRUS</u>                                                | 1.84                     | 0.0019 | <b>0.0197</b> |
| C5 GO Biological Process | <u>GOBP RESPONSE TO LECTIN</u>                                                | 1.84                     | 0.0000 | <b>0.0197</b> |
| C5 GO Biological Process | <u>GOBP PROTEIN INSERTION INTO ER MEMBRANE</u>                                | 1.84                     | 0.0018 | <b>0.0197</b> |
| C5 GO Biological Process | <u>GOBP ATP METABOLIC PROCESS</u>                                             | 1.84                     | 0.0000 | <b>0.0197</b> |
| C2 WikiPathways pathway  | <u>WP TLR4 SIGNALING AND TOLERANCE</u>                                        | 1.84                     | 0.0019 | <b>0.0197</b> |

|                          |                                                                                                                          |      |        |               |
|--------------------------|--------------------------------------------------------------------------------------------------------------------------|------|--------|---------------|
| C2 BioCarta pathway      | <u>BIOCARTA ERAD PATHWAY</u>                                                                                             | 1.84 | 0.0020 | <b>0.0198</b> |
| C2 Reactome pathway      | <u>REACTOME DECTIN 1 MEDIATED NONCANONICAL NF KB SIGNALING</u>                                                           | 1.84 | 0.0000 | <b>0.0198</b> |
| C5 GO Biological Process | <u>GOBP REGULATION OF T CELL ACTIVATION</u>                                                                              | 1.84 | 0.0000 | <b>0.0198</b> |
| C2 WikiPathways pathway  | <u>WP HOSTPATHOGEN INTERACTION OF HUMAN CORO NAVIRUSES INTERFERON INDUCTION</u>                                          | 1.84 | 0.0000 | <b>0.0198</b> |
| C2 Reactome pathway      | <u>REACTOME NUCLEOTIDE BINDING DOMAIN LEUCINE R ICH REPEAT CONTAINING RECEPTOR NLR SIGNALING PATHWAYS</u>                | 1.84 | 0.0000 | <b>0.0198</b> |
| C5 GO Molecular Function | <u>GOMF POLYUBIQUITIN MODIFICATION DEPENDENT PR OTEIN BINDING</u>                                                        | 1.84 | 0.0000 | <b>0.0198</b> |
| C5 GO Cellular Component | <u>GOCC AZUROPHIL GRANULE</u>                                                                                            | 1.84 | 0.0000 | <b>0.0198</b> |
| C5 GO Biological Process | <u>GOBP REGULATION OF CELLULAR RESPIRATION</u>                                                                           | 1.84 | 0.0000 | <b>0.0198</b> |
| C5 GO Molecular Function | <u>GOMF ADP BINDING</u>                                                                                                  | 1.84 | 0.0000 | <b>0.0199</b> |
| C5 GO Biological Process | <u>GOBP NEGATIVE REGULATION OF FIBROBLAST PROLIF ERATION</u>                                                             | 1.84 | 0.0056 | <b>0.0199</b> |
| C5 GO Cellular Component | <u>GOCC SMALL SUBUNIT PROCESSOME</u>                                                                                     | 1.84 | 0.0018 | <b>0.0199</b> |
| C2 Reactome pathway      | <u>REACTOME REGULATION OF CHOLESTEROL BIOSYNTHESIS BY SREBP SREBF</u>                                                    | 1.84 | 0.0000 | <b>0.0199</b> |
| C2 PID pathway           | <u>PID FOXO PATHWAY</u>                                                                                                  | 1.84 | 0.0000 | <b>0.0200</b> |
| C2 Reactome pathway      | <u>REACTOME SEPARATION OF SISTER CHROMATIDS</u>                                                                          | 1.83 | 0.0000 | <b>0.0200</b> |
| C2 Reactome pathway      | <u>REACTOME APC C CDH1 MEDIATED DEGRADATION OF CDC20 AND OTHER APC C CDH1 TARGETED PROTEINS IN LATE MITOSIS EARLY G1</u> | 1.84 | 0.0000 | <b>0.0200</b> |
| C2 Reactome pathway      | <u>REACTOME C TYPE LECTIN RECEPTORS CLRS</u>                                                                             | 1.83 | 0.0000 | <b>0.0200</b> |
| C5 GO Molecular Function | <u>GOMF PROTEIN SELF ASSOCIATION</u>                                                                                     | 1.84 | 0.0017 | <b>0.0201</b> |
| C5 GO Molecular Function | <u>GOMF PROTEIN PHOSPHATASE BINDING</u>                                                                                  | 1.84 | 0.0000 | <b>0.0201</b> |
| C5 GO Cellular Component | <u>GOCC PROTON TRANSPORTING ATP SYNTHASE COMPLEX</u>                                                                     | 1.84 | 0.0019 | <b>0.0201</b> |
| C2 Reactome pathway      | <u>REACTOME RHO GTPASES ACTIVATE WASPS AND WAVES</u>                                                                     | 1.83 | 0.0020 | <b>0.0201</b> |
| C5 GO Biological Process | <u>GOBP GOLGI TO ENDOSOME TRANSPORT</u>                                                                                  | 1.83 | 0.0056 | <b>0.0201</b> |
| C2 Reactome pathway      | <u>REACTOME TP53 REGULATES METABOLIC GENES</u>                                                                           | 1.83 | 0.0000 | <b>0.0201</b> |
| C2 BioCarta pathway      | <u>BIOCARTA RELA PATHWAY</u>                                                                                             | 1.83 | 0.0037 | <b>0.0203</b> |
| C5 GO Biological Process | <u>GOBP REGULATION OF PROGRAMMED NECROTIC CELL DEATH</u>                                                                 | 1.83 | 0.0018 | <b>0.0204</b> |
| C5 GO Molecular Function | <u>GOMF UBIQUITIN BINDING</u>                                                                                            | 1.83 | 0.0000 | <b>0.0204</b> |
| C5 GO Biological Process | <u>GOBP PROTEIN LOCALIZATION TO CHROMOSOME TELL OMERIC REGION</u>                                                        | 1.83 | 0.0000 | <b>0.0204</b> |
| C5 GO Cellular Component | <u>GOCC PROTEASOME COMPLEX</u>                                                                                           | 1.83 | 0.0035 | <b>0.0204</b> |

|                          |                                                                 |      |        |               |
|--------------------------|-----------------------------------------------------------------|------|--------|---------------|
| C2 Reactome pathway      | <u>REACTOME DNA REPLICATION PRE INITIATION</u>                  | 1.83 | 0.0000 | <b>0.0204</b> |
| C5 GO Molecular Function | <u>GOMF TRANSLATION REGULATOR ACTIVITY NUCLEIC ACID BINDING</u> | 1.83 | 0.0000 | <b>0.0204</b> |

| Group                    | Gene Set Name                                                                              | NES                      | p      | FDR q         |
|--------------------------|--------------------------------------------------------------------------------------------|--------------------------|--------|---------------|
|                          |                                                                                            | post, trained vs control |        |               |
| C2 Reactome pathway      | <u>REACTOME METABOLISM OF POLYAMINES</u>                                                   | 1.83                     | 0.0018 | <b>0.0204</b> |
| C2 Reactome pathway      | <u>REACTOME ORC1 REMOVAL FROM CHROMATIN</u>                                                | 1.83                     | 0.0018 | <b>0.0204</b> |
| C2 Reactome pathway      | <u>REACTOME ANTIGEN PRESENTATION FOLDING ASSEMBLY AND PEPTIDE LOADING OF CLASS I MHC</u>   | 1.83                     | 0.0056 | <b>0.0204</b> |
| C2 KEGG pathway          | <u>KEGG TOLL LIKE RECEPTOR SIGNALING PATHWAY</u>                                           | 1.83                     | 0.0000 | <b>0.0204</b> |
| C2 KEGG pathway          | <u>KEGG CYTOSOLIC DNA SENSING PATHWAY</u>                                                  | 1.83                     | 0.0036 | <b>0.0205</b> |
| C2 Reactome pathway      | <u>REACTOME DEFECTIVE CFTR CAUSES CYSTIC FIBROSIS</u>                                      | 1.83                     | 0.0019 | <b>0.0205</b> |
| C5 GO Molecular Function | <u>GOMF TRANSLATION FACTOR ACTIVITY RNA BINDING</u>                                        | 1.83                     | 0.0000 | <b>0.0205</b> |
| C2 Reactome pathway      | <u>REACTOME TP53 REGULATES TRANSCRIPTION OF DNA REPAIR GENES</u>                           | 1.83                     | 0.0018 | <b>0.0206</b> |
| C5 GO Biological Process | <u>GOBP PROTEIN K48 LINKED UBIQUITINATION</u>                                              | 1.83                     | 0.0000 | <b>0.0206</b> |
| C2 Reactome pathway      | <u>REACTOME RUNX1 REGULATES TRANSCRIPTION OF GENES INVOLVED IN DIFFERENTIATION OF HSCS</u> | 1.83                     | 0.0000 | <b>0.0207</b> |
| C2 Reactome pathway      | <u>REACTOME MTOR SIGNALLING</u>                                                            | 1.83                     | 0.0035 | <b>0.0208</b> |
| C2 Reactome pathway      | <u>REACTOME MITOTIC G2 G2 M PHASES</u>                                                     | 1.82                     | 0.0000 | <b>0.0209</b> |
| C2 Reactome pathway      | <u>REACTOME CITRIC ACID CYCLE TCA CYCLE</u>                                                | 1.82                     | 0.0037 | <b>0.0209</b> |
| C2 WikiPathways pathway  | <u>WP COHESIN COMPLEX CORNELIA DE LANGE SYNDROME</u>                                       | 1.82                     | 0.0018 | <b>0.0212</b> |
| C2 Reactome pathway      | <u>REACTOME NEGATIVE REGULATION OF NOTCH4 SIGNALING</u>                                    | 1.82                     | 0.0000 | <b>0.0212</b> |
| C2 Reactome pathway      | <u>REACTOME STABILIZATION OF P53</u>                                                       | 1.82                     | 0.0020 | <b>0.0213</b> |
| C5 GO Biological Process | <u>GOBP ALPHA BETA T CELL ACTIVATION</u>                                                   | 1.82                     | 0.0000 | <b>0.0215</b> |
| C2 WikiPathways pathway  | <u>WP PI3KAKTMTOR SIGNALING PATHWAY AND THERAPEUTIC OPPORTUNITIES</u>                      | 1.82                     | 0.0018 | <b>0.0217</b> |
| C2 Reactome pathway      | <u>REACTOME TGF BETA RECEPTOR SIGNALING ACTIVATES SMADS</u>                                | 1.82                     | 0.0037 | <b>0.0220</b> |
| C2 Reactome pathway      | <u>REACTOME M PHASE</u>                                                                    | 1.82                     | 0.0000 | <b>0.0220</b> |
| C5 GO Biological Process | <u>GOBP REGULATION OF PHAGOCYTOSIS</u>                                                     | 1.82                     | 0.0000 | <b>0.0220</b> |
| C2 PID pathway           | <u>PID IL12 STAT4 PATHWAY</u>                                                              | 1.82                     | 0.0017 | <b>0.0222</b> |
| C2 WikiPathways pathway  | <u>WP EUKARYOTIC TRANSCRIPTION INITIATION</u>                                              | 1.82                     | 0.0018 | <b>0.0222</b> |
| C5 GO Biological Process | <u>GOBP SELECTIVE AUTOPHAGY</u>                                                            | 1.82                     | 0.0000 | <b>0.0222</b> |
| C2 WikiPathways pathway  | <u>WP ANDROGEN RECEPTOR SIGNALING PATHWAY</u>                                              | 1.82                     | 0.0000 | <b>0.0223</b> |

|                          |                                                                 |      |        |               |
|--------------------------|-----------------------------------------------------------------|------|--------|---------------|
| C5 GO Biological Process | <u>GOBP PROTEIN TARGETING TO PEROXISOME</u>                     | 1.81 | 0.0019 | <b>0.0223</b> |
| C2 Reactome pathway      | <u>REACTOME DEGRADATION OF DVL</u>                              | 1.81 | 0.0000 | <b>0.0226</b> |
| C5 GO Biological Process | <u>GOBP POSITIVE REGULATION OF CELL ACTIVATION</u>              | 1.81 | 0.0000 | <b>0.0229</b> |
| C2 KEGG pathway          | <u>KEGG LYSOSOME</u>                                            | 1.81 | 0.0000 | <b>0.0230</b> |
| C2 Reactome pathway      | <u>REACTOME REGULATION OF HMOX1 EXPRESSION AND ACTIVITY</u>     | 1.81 | 0.0017 | <b>0.0230</b> |
| C5 GO Biological Process | <u>GOBP CELL KILLING</u>                                        | 1.81 | 0.0000 | <b>0.0232</b> |
| C2 BioCarta pathway      | <u>BIOCARTA CSK PATHWAY</u>                                     | 1.81 | 0.0000 | <b>0.0235</b> |
| C5 GO Biological Process | <u>GOBP CELL DEATH IN RESPONSE TO OXIDATIVE STRESS</u>          | 1.81 | 0.0000 | <b>0.0235</b> |
| C5 GO Cellular Component | <u>GOCC RNA POLYMERASE COMPLEX</u>                              | 1.81 | 0.0017 | <b>0.0236</b> |
| C5 GO Biological Process | <u>GOBP POSITIVE REGULATION OF LEUKOCYTE CELL CELL ADHESION</u> | 1.81 | 0.0000 | <b>0.0236</b> |
| C2 Reactome pathway      | <u>REACTOME SIGNALING BY INTERLEUKINS</u>                       | 1.81 | 0.0000 | <b>0.0237</b> |
| C2 PID pathway           | <u>PID TGFBR PATHWAY</u>                                        | 1.81 | 0.0000 | <b>0.0239</b> |
| C2 WikiPathways pathway  | <u>WP T CELL RECEPTOR AND COSTIMULATORY SIGNALING</u>           | 1.81 | 0.0056 | <b>0.0241</b> |
| C2 Reactome pathway      | <u>REACTOME RAF INDEPENDENT MAPK1 3 ACTIVATION</u>              | 1.80 | 0.0038 | <b>0.0242</b> |
| C5 GO Biological Process | <u>GOBP RRNA TRANSCRIPTION</u>                                  | 1.80 | 0.0000 | <b>0.0242</b> |
| C5 GO Molecular Function | <u>GOMF MACROMOLECULE TRANSMEMBRANE TRANSPORTER ACTIVITY</u>    | 1.80 | 0.0037 | <b>0.0243</b> |
| C2 PID pathway           | <u>PID MYC PATHWAY</u>                                          | 1.80 | 0.0038 | <b>0.0243</b> |

| Group                    | Gene Set Name                                                     | NES                      | p      | FDR q         |
|--------------------------|-------------------------------------------------------------------|--------------------------|--------|---------------|
|                          |                                                                   | post, trained vs control |        |               |
| C5 GO Biological Process | <u>GOBP CHROMATIN DISASSEMBLY</u>                                 | 1.80                     | 0.0057 | <b>0.0243</b> |
| C5 GO Biological Process | <u>GOBP NUCLEAR EXPORT</u>                                        | 1.80                     | 0.0000 | <b>0.0243</b> |
| C2 PID pathway           | <u>PID NFAT 3PATHWAY</u>                                          | 1.80                     | 0.0000 | <b>0.0244</b> |
| C2 PID pathway           | <u>PID CD8 TCR DOWNSTREAM PATHWAY</u>                             | 1.80                     | 0.0018 | <b>0.0244</b> |
| C5 GO Molecular Function | <u>GOMF PEPTIDASE ACTIVATOR ACTIVITY</u>                          | 1.80                     | 0.0000 | <b>0.0244</b> |
| C2 Reactome pathway      | <u>REACTOME GOLGI TO ER RETROGRADE TRANSPORT</u>                  | 1.80                     | 0.0000 | <b>0.0244</b> |
| C2 BioCarta pathway      | <u>BIOCARTA TCR PATHWAY</u>                                       | 1.80                     | 0.0035 | <b>0.0245</b> |
| C2 Reactome pathway      | <u>REACTOME CDT1 ASSOCIATION WITH THE CDC6 ORC ORIGIN COMPLEX</u> | 1.80                     | 0.0000 | <b>0.0245</b> |
| C2 Reactome pathway      | <u>REACTOME INHIBITION OF DNA RECOMBINATION AT TELOMERE</u>       | 1.80                     | 0.0053 | <b>0.0245</b> |
| C5 GO Biological Process | <u>GOBP NUCLEAR TRANSPORT</u>                                     | 1.80                     | 0.0000 | <b>0.0245</b> |
| C2 KEGG pathway          | <u>KEGG CITRATE CYCLE TCA CYCLE</u>                               | 1.80                     | 0.0000 | <b>0.0246</b> |
| C2 Reactome pathway      | <u>REACTOME CELL CYCLE MITOTIC</u>                                | 1.80                     | 0.0000 | <b>0.0246</b> |



|                          |                                                                                              |       |        |               |
|--------------------------|----------------------------------------------------------------------------------------------|-------|--------|---------------|
| C2 KEGG pathway          | <u>KEGG OXIDATIVE PHOSPHORYLATION</u>                                                        | 1.80  | 0.0000 | <b>0.0246</b> |
| C2 Reactome pathway      | <u>REACTOME DEGRADATION OF GLI1 BY THE PROTEASOME</u>                                        | 1.80  | 0.0000 | <b>0.0248</b> |
| C5 GO Cellular Component | <u>GOCC COPI COATED VESICLE</u>                                                              | 1.80  | 0.0037 | <b>0.0249</b> |
| C5 GO Cellular Component | <u>GOCC TRANSCRIPTION ELONGATION FACTOR COMPLEX</u>                                          | 1.80  | 0.0018 | <b>0.0251</b> |
| C2 Reactome pathway      | <u>REACTOME MITOTIC METAPHASE AND ANAPHASE</u>                                               | 1.80  | 0.0000 | <b>0.0251</b> |
| C5 GO Biological Process | <u>GOBP MAST CELL ACTIVATION INVOLVED IN IMMUNE RESPONSE</u>                                 | 1.80  | 0.0000 | <b>0.0252</b> |
| C2 WikiPathways pathway  | <u>WP HEMATOPOIETIC STEM CELL GENE REGULATION BY GABP ALPHABETA COMPLEX</u>                  | 1.79  | 0.0000 | <b>0.0252</b> |
| C2 WikiPathways pathway  | <u>WP NETRINUNC5B SIGNALING PATHWAY</u>                                                      | 1.80  | 0.0018 | <b>0.0252</b> |
| C5 GO Biological Process | <u>GOBP IMMUNOGLOBULIN PRODUCTION</u>                                                        | 1.79  | 0.0000 | <b>0.0252</b> |
| C5 GO Biological Process | <u>GOBP ATP BIOSYNTHETIC PROCESS</u>                                                         | 1.79  | 0.0000 | <b>0.0252</b> |
| C2 WikiPathways pathway  | <u>WP TYPE II DIABETES MELLITUS</u>                                                          | 1.79  | 0.0055 | <b>0.0252</b> |
| C5 GO Biological Process | <u>GOBP REGULATION OF TRANSLATION IN RESPONSE TO STRESS</u>                                  | 1.79  | 0.0073 | <b>0.0252</b> |
| C5 GO Biological Process | <u>GOBP SPLICEOSOMAL COMPLEX ASSEMBLY</u>                                                    | 1.79  | 0.0000 | <b>0.0252</b> |
| C5 GO Biological Process | <u>GOBP ACTIVATION OF CYSTEINE TYPE ENDOPEPTIDASE ACTIVITY INVOLVED IN APOPTOTIC PROCESS</u> | 1.79  | 0.0000 | <b>0.0252</b> |
| C5 GO Biological Process | <u>GOBP CELLULAR RESPONSE TO PROSTAGLANDIN ESTIMULUS</u>                                     | 1.79  | 0.0075 | <b>0.0253</b> |
| C5 GO Biological Process | <u>GOBP FC RECEPTOR SIGNALING PATHWAY</u>                                                    | 1.79  | 0.0034 | <b>0.0253</b> |
| C2 Reactome pathway      | <u>REACTOME INTERLEUKIN 17 SIGNALING</u>                                                     | 1.79  | 0.0000 | <b>0.0253</b> |
| C2 Reactome pathway      | <u>REACTOME RNA POLYMERASE III TRANSCRIPTION INITIATION FROM TYPE 1 PROMOTER</u>             | 1.79  | 0.0000 | <b>0.0253</b> |
| C5 GO Biological Process | <u>GOBP ENDOCRINE HORMONE SECRETION</u>                                                      | -2.22 | 0.0000 | <b>0.0253</b> |
| C5 GO Biological Process | <u>GOBP REGULATION OF CELLULAR AMIDE METABOLIC PROCESS</u>                                   | 1.79  | 0.0000 | <b>0.0255</b> |
| C2 WikiPathways pathway  | <u>WP ATM SIGNALING IN DEVELOPMENT AND DISEASE</u>                                           | 1.79  | 0.0000 | <b>0.0257</b> |
| C5 GO Biological Process | <u>GOBP ATP SYNTHESIS COUPLED ELECTRON TRANSPORT</u>                                         | 1.79  | 0.0000 | <b>0.0258</b> |
| C5 GO Biological Process | <u>GOBP ENERGY DERIVATION BY OXIDATION OF ORGANIC COMPOUNDS</u>                              | 1.79  | 0.0000 | <b>0.0259</b> |
| C2 Reactome pathway      | <u>REACTOME CYCLIN A CDK2 ASSOCIATED EVENTS AT S PHASE ENTRY</u>                             | 1.79  | 0.0000 | <b>0.0260</b> |
| C5 GO Biological Process | <u>GOBP HISTONE H4 K16 ACETYLATION</u>                                                       | 1.79  | 0.0053 | <b>0.0262</b> |
| C5 GO Biological Process | <u>GOBP REGULATION OF PROTEIN STABILITY</u>                                                  | 1.79  | 0.0000 | <b>0.0262</b> |
| C5 GO Biological Process | <u>GOBP MRNA PROCESSING</u>                                                                  | 1.79  | 0.0000 | <b>0.0262</b> |
| C5 GO Biological Process | <u>GOBP REGULATION OF HISTONE MODIFICATION</u>                                               | 1.79  | 0.0000 | <b>0.0262</b> |
| C5 GO Biological Process | <u>GOBP LYSOSOMAL TRANSPORT</u>                                                              | 1.79  | 0.0000 | <b>0.0263</b> |

|                     |                                                    |      |        |               |
|---------------------|----------------------------------------------------|------|--------|---------------|
| C2 Reactome pathway | <u>REACTOME HIV ELONGATION ARREST AND RECOVERY</u> | 1.79 | 0.0019 | <b>0.0263</b> |
|---------------------|----------------------------------------------------|------|--------|---------------|

| Group                    | Gene Set Name                                                             | NES                      | p      | FDR q         |
|--------------------------|---------------------------------------------------------------------------|--------------------------|--------|---------------|
|                          |                                                                           | post, trained vs control |        |               |
| C2 Reactome pathway      | <u>REACTOME DEGRADATION OF AXIN</u>                                       | 1.78                     | 0.0000 | <b>0.0263</b> |
| C2 WikiPathways pathway  | <u>WP ESTROGEN SIGNALING PATHWAY</u>                                      | 1.79                     | 0.0055 | <b>0.0264</b> |
| C2 Reactome pathway      | <u>REACTOME INACTIVATION OF CSF3 G CSF SIGNALING</u>                      | 1.79                     | 0.0037 | <b>0.0264</b> |
| C2 Reactome pathway      | <u>REACTOME FCERI MEDIATED CA 2 MOBILIZATION</u>                          | 1.78                     | 0.0074 | <b>0.0264</b> |
| C2 PID pathway           | <u>PID MTOR 4PATHWAY</u>                                                  | 1.79                     | 0.0017 | <b>0.0264</b> |
| C2 KEGG pathway          | <u>KEGG PEROXISOME</u>                                                    | 1.79                     | 0.0000 | <b>0.0264</b> |
| C5 GO Biological Process | <u>GOBP TRANSCRIPTION BY RNA POLYMERASE I</u>                             | 1.78                     | 0.0035 | <b>0.0264</b> |
| C5 GO Biological Process | <u>GOBP NEGATIVE REGULATION OF ALPHA BETA T CELL ACTIVATION</u>           | 1.78                     | 0.0053 | <b>0.0264</b> |
| Hallmark                 | <u>HALLMARK PEROXISOME</u>                                                | 1.78                     | 0.0000 | <b>0.0264</b> |
| C5 GO Biological Process | <u>GOBP TELOMERASE RNA LOCALIZATION</u>                                   | 1.78                     | 0.0000 | <b>0.0264</b> |
| C5 GO Biological Process | <u>GOBP POSITIVE REGULATION OF HISTONE METHYLATION</u>                    | 1.78                     | 0.0000 | <b>0.0265</b> |
| C5 GO Biological Process | <u>GOBP REGULATION OF GOLGI ORGANIZATION</u>                              | 1.78                     | 0.0037 | <b>0.0265</b> |
| C2 Reactome pathway      | <u>REACTOME THE ROLE OF GTSE1 IN G2 M PROGRESSION AFTER G2 CHECKPOINT</u> | 1.78                     | 0.0018 | <b>0.0269</b> |
| C5 GO Biological Process | <u>GOBP NEGATIVE REGULATION OF HISTONE MODIFICATION</u>                   | 1.78                     | 0.0000 | <b>0.0271</b> |
| C5 GO Biological Process | <u>GOBP DNA TEMPLATED TRANSCRIPTION INITIATION</u>                        | 1.78                     | 0.0000 | <b>0.0273</b> |
| C5 GO Biological Process | <u>GOBP GENERATION OF PRECURSOR METABOLITES AND ENERGY</u>                | 1.78                     | 0.0000 | <b>0.0274</b> |
| C5 GO Cellular Component | <u>GOCC RNA POLYMERASE II HOLOENZYME</u>                                  | 1.78                     | 0.0000 | <b>0.0276</b> |
| C5 GO Biological Process | <u>GOBP RNA EXPORT FROM NUCLEUS</u>                                       | 1.78                     | 0.0019 | <b>0.0277</b> |
| C2 BioCarta pathway      | <u>BIOCARTA IL2RB PATHWAY</u>                                             | 1.78                     | 0.0074 | <b>0.0283</b> |
| C5 GO Biological Process | <u>GOBP POSITIVE REGULATION OF LEUKOCYTE DEGRANULATION</u>                | 1.77                     | 0.0114 | <b>0.0284</b> |
| C2 Reactome pathway      | <u>REACTOME RHOB GTPASE CYCLE</u>                                         | 1.77                     | 0.0000 | <b>0.0284</b> |
| C5 GO Biological Process | <u>GOBP REGULATION OF REACTIVE OXYGEN SPECIES BIOSYNTHETIC PROCESS</u>    | 1.77                     | 0.0018 | <b>0.0284</b> |
| C5 GO Biological Process | <u>GOBP MACROPHAGE ACTIVATION INVOLVED IN IMMUNE RESPONSE</u>             | 1.77                     | 0.0057 | <b>0.0284</b> |
| C5 GO Biological Process | <u>GOBP ELECTRON TRANSPORT CHAIN</u>                                      | 1.78                     | 0.0000 | <b>0.0284</b> |
| C2 Reactome pathway      | <u>REACTOME REGULATION OF TP53 ACTIVITY THROUGH METHYLATION</u>           | 1.77                     | 0.0036 | <b>0.0284</b> |
| C5 GO Biological Process | <u>GOBP INTERMEMBRANE LIPID TRANSFER</u>                                  | 1.77                     | 0.0019 | <b>0.0284</b> |

|                          |                                                                 |       |        |               |
|--------------------------|-----------------------------------------------------------------|-------|--------|---------------|
| C5 GO Biological Process | <u>GOBP LEUKOCYTE CELL CELL ADHESION</u>                        | 1.77  | 0.0000 | <b>0.0284</b> |
| C5 GO Molecular Function | <u>GOMF PROTEIN TRANSMEMBRANE TRANSPORTER ACTIVITY</u>          | 1.77  | 0.0037 | <b>0.0284</b> |
| C2 Reactome pathway      | <u>REACTOME SEALING OF THE NUCLEAR ENVELOPE NE BY ESCRT III</u> | 1.77  | 0.0155 | <b>0.0285</b> |
| C5 GO Biological Process | <u>GOBP PATTERN RECOGNITION RECEPTOR SIGNALING PATHWAY</u>      | 1.77  | 0.0000 | <b>0.0285</b> |
| C2 Reactome pathway      | <u>REACTOME REGULATION OF PTEN STABILITY AND ACTIVITY</u>       | 1.77  | 0.0018 | <b>0.0285</b> |
| C2 Reactome pathway      | <u>REACTOME ROLE OF PHOSPHOLIPIDS IN PHAGOCYTOSIS</u>           | 1.77  | 0.0018 | <b>0.0286</b> |
| C5 GO Biological Process | <u>GOBP PROTEIN LOCALIZATION TO NUCLEUS</u>                     | 1.77  | 0.0000 | <b>0.0286</b> |
| C2 Reactome pathway      | <u>REACTOME CELLULAR RESPONSE TO CHEMICAL STRESS</u>            | 1.77  | 0.0000 | <b>0.0286</b> |
| C2 WikiPathways pathway  | <u>WP EPO RECEPTOR SIGNALING</u>                                | 1.77  | 0.0036 | <b>0.0287</b> |
| C2 WikiPathways pathway  | <u>WP METABOLIC REPROGRAMMING IN COLON CANCER</u>               | 1.77  | 0.0000 | <b>0.0288</b> |
| C5 GO Biological Process | <u>GOBP NEGATIVE REGULATION OF LYMPHOCYTE ACTIVATION</u>        | 1.77  | 0.0000 | <b>0.0289</b> |
| C5 GO Biological Process | <u>GOBP VERY LONG CHAIN FATTY ACID METABOLIC PROCESS</u>        | 1.77  | 0.0036 | <b>0.0290</b> |
| C2 Reactome pathway      | <u>REACTOME MITOCHONDRIAL PROTEIN IMPORT</u>                    | 1.77  | 0.0017 | <b>0.0290</b> |
| C5 GO Molecular Function | <u>GOMF EXTRACELLULAR MATRIX STRUCTURAL CONSTITUENT</u>         | -2.16 | 0.0000 | <b>0.0290</b> |
| C2 WikiPathways pathway  | <u>WP IL4 SIGNALING PATHWAY</u>                                 | 1.77  | 0.0054 | <b>0.0291</b> |
| C5 GO Molecular Function | <u>GOMF BASAL TRANSCRIPTION MACHINERY BINDING</u>               | 1.77  | 0.0000 | <b>0.0291</b> |

| Group                    | Gene Set Name                                                                 | NES                      | p      | FDR q         |
|--------------------------|-------------------------------------------------------------------------------|--------------------------|--------|---------------|
|                          |                                                                               | post, trained vs control |        |               |
| C5 GO Biological Process | <u>GOBP NEGATIVE REGULATION OF IMMUNE EFFECTOR PROCESS</u>                    | 1.77                     | 0.0000 | <b>0.0291</b> |
| C2 Reactome pathway      | <u>REACTOME BETA CATENIN PHOSPHORYLATION CASCADE</u>                          | 1.77                     | 0.0057 | <b>0.0292</b> |
| C5 GO Cellular Component | <u>GOCC PROTEASOME CORE COMPLEX</u>                                           | 1.77                     | 0.0000 | <b>0.0292</b> |
| C2 Reactome pathway      | <u>REACTOME CELLULAR RESPONSE TO HYPOXIA</u>                                  | 1.77                     | 0.0000 | <b>0.0292</b> |
| C2 Reactome pathway      | <u>REACTOME TNFR2 NON CANONICAL NF KB PATHWAY</u>                             | 1.77                     | 0.0017 | <b>0.0292</b> |
| C2 PID pathway           | <u>PID PI3K/AKT PATHWAY</u>                                                   | 1.77                     | 0.0018 | <b>0.0294</b> |
| C2 KEGG pathway          | <u>KEGG PROTEASOME</u>                                                        | 1.77                     | 0.0019 | <b>0.0295</b> |
| C2 Reactome pathway      | <u>REACTOME CELLULAR SENESCENCE</u>                                           | 1.76                     | 0.0000 | <b>0.0296</b> |
| C5 GO Biological Process | <u>GOBP PROTEASOME MEDIATED UBIQUITIN DEPENDENT PROTEIN CATABOLIC PROCESS</u> | 1.76                     | 0.0000 | <b>0.0296</b> |

|                          |                                                                                              |      |        |               |
|--------------------------|----------------------------------------------------------------------------------------------|------|--------|---------------|
| C5 GO Biological Process | <u>GOBP REGULATION OF B CELL ACTIVATION</u>                                                  | 1.76 | 0.0017 | <b>0.0298</b> |
| C5 GO Biological Process | <u>GOBP PROTEIN MONOUBIQUITINATION</u>                                                       | 1.76 | 0.0017 | <b>0.0300</b> |
| C2 WikiPathways pathway  | <u>WP OXIDATIVE PHOSPHORYLATION</u>                                                          | 1.76 | 0.0019 | <b>0.0302</b> |
| C2 Reactome pathway      | <u>REACTOME REGULATION OF TP53 ACTIVITY</u>                                                  | 1.76 | 0.0000 | <b>0.0302</b> |
| C2 WikiPathways pathway  | <u>WP CORI CYCLE</u>                                                                         | 1.76 | 0.0056 | <b>0.0302</b> |
| C5 GO Biological Process | <u>GOBP POSITIVE REGULATION OF TRANSLATION</u>                                               | 1.76 | 0.0000 | <b>0.0304</b> |
| C5 GO Molecular Function | <u>GOMF NUCLEAR LOCALIZATION SEQUENCE BINDING</u>                                            | 1.76 | 0.0078 | <b>0.0304</b> |
| C5 GO Biological Process | <u>GOBP REGULATION OF B CELL PROLIFERATION</u>                                               | 1.76 | 0.0000 | <b>0.0304</b> |
| C2 BioCarta pathway      | <u>BIOCARTA CERAMIDE PATHWAY</u>                                                             | 1.76 | 0.0019 | <b>0.0305</b> |
| C5 GO Biological Process | <u>GOBP LEUKOCYTE PROLIFERATION</u>                                                          | 1.76 | 0.0000 | <b>0.0305</b> |
| C5 GO Biological Process | <u>GOBP RIBONUCLEOSIDE TRIPHOSPHATE METABOLIC PROCESS</u>                                    | 1.76 | 0.0000 | <b>0.0305</b> |
| C5 GO Biological Process | <u>GOBP ATP SYNTHESIS COUPLED PROTON TRANSPORT</u>                                           | 1.76 | 0.0055 | <b>0.0305</b> |
| C5 GO Molecular Function | <u>GOMF ELECTRON TRANSFER ACTIVITY</u>                                                       | 1.76 | 0.0000 | <b>0.0305</b> |
| C2 Reactome pathway      | <u>REACTOME DAP12 SIGNALING</u>                                                              | 1.76 | 0.0018 | <b>0.0305</b> |
| C2 PID pathway           | <u>PID PS1 PATHWAY</u>                                                                       | 1.76 | 0.0035 | <b>0.0305</b> |
| C5 GO Biological Process | <u>GOBP FIBROBLAST APOPTOTIC PROCESS</u>                                                     | 1.76 | 0.0019 | <b>0.0305</b> |
| C5 GO Biological Process | <u>GOBP REGULATION OF IMMUNOGLOBULIN PRODUCTION</u>                                          | 1.76 | 0.0000 | <b>0.0306</b> |
| C5 GO Biological Process | <u>GOBP CELLULAR LIPID CATABOLIC PROCESS</u>                                                 | 1.76 | 0.0000 | <b>0.0307</b> |
| C5 GO Cellular Component | <u>GOCC TRAPP COMPLEX</u>                                                                    | 1.76 | 0.0073 | <b>0.0307</b> |
| C2 Reactome pathway      | <u>REACTOME CYTOPROTECTION BY HMOX1</u>                                                      | 1.76 | 0.0000 | <b>0.0307</b> |
| C2 Reactome pathway      | <u>REACTOME APC C MEDIATED DEGRADATION OF CELL CYCLE PROTEINS</u>                            | 1.76 | 0.0000 | <b>0.0307</b> |
| C5 GO Biological Process | <u>GOBP POSITIVE REGULATION OF PROTEASOMAL UBIQUITIN DEPENDENT PROTEIN CATABOLIC PROCESS</u> | 1.76 | 0.0017 | <b>0.0308</b> |
| C5 GO Biological Process | <u>GOBP ORGANELLE INHERITANCE</u>                                                            | 1.75 | 0.0059 | <b>0.0310</b> |
| C5 GO Biological Process | <u>GOBP ESTABLISHMENT OF PROTEIN LOCALIZATION TO ENDOPLASMIC RETICULUM</u>                   | 1.75 | 0.0052 | <b>0.0311</b> |
| C2 Reactome pathway      | <u>REACTOME TRANSCRIPTIONAL REGULATION BY VENTX</u>                                          | 1.75 | 0.0068 | <b>0.0311</b> |
| C5 GO Biological Process | <u>GOBP CERAMIDE CATABOLIC PROCESS</u>                                                       | 1.75 | 0.0036 | <b>0.0311</b> |
| C5 GO Biological Process | <u>GOBP POSITIVE REGULATION OF ALPHA BETA T CELL ACTIVATION</u>                              | 1.75 | 0.0053 | <b>0.0312</b> |
| C5 GO Biological Process | <u>GOBP RECEPTOR CATABOLIC PROCESS</u>                                                       | 1.75 | 0.0000 | <b>0.0312</b> |
| C5 GO Biological Process | <u>GOBP NEGATIVE REGULATION OF KINASE ACTIVITY</u>                                           | 1.75 | 0.0000 | <b>0.0312</b> |
| C5 GO Biological Process | <u>GOBP NEGATIVE REGULATION OF PEPTIDYL LYSINE ACETYLATION</u>                               | 1.75 | 0.0073 | <b>0.0312</b> |
| C2 WikiPathways pathway  | <u>WP IL7 SIGNALING PATHWAY</u>                                                              | 1.75 | 0.0074 | <b>0.0312</b> |
| C5 GO Biological Process | <u>GOBP MITOCHONDRIAL TRANSMEMBRANE TRANSPORT</u>                                            | 1.75 | 0.0000 | <b>0.0312</b> |

|                 |                                 |      |        |               |
|-----------------|---------------------------------|------|--------|---------------|
| C2 KEGG pathway | <u>KEGG_ALLOGRAFT_REJECTION</u> | 1.75 | 0.0018 | <b>0.0313</b> |
|-----------------|---------------------------------|------|--------|---------------|

| Group                    | Gene Set Name                                                   | NES                      | p      | FDR q         |
|--------------------------|-----------------------------------------------------------------|--------------------------|--------|---------------|
|                          |                                                                 | post, trained vs control |        |               |
| C5 GO Cellular Component | <u>GOCC_PHOTORECEPTOR_INNER_SEGMENT</u>                         | -2.13                    | 0.0000 | <b>0.0315</b> |
| C2 Reactome pathway      | <u>REACTOME_ABC_FAMILY_PROTEINS_MEDIATED_TRANSPORT</u>          | 1.75                     | 0.0000 | <b>0.0317</b> |
| C2 Reactome pathway      | <u>REACTOME_DUAL_INCISION_IN_TC_NER</u>                         | 1.75                     | 0.0018 | <b>0.0318</b> |
| C2 PID pathway           | <u>PID_IFNG_PATHWAY</u>                                         | 1.75                     | 0.0056 | <b>0.0318</b> |
| C2 Reactome pathway      | <u>REACTOME_MAP2K_AND_MAPK_ACTIVATION</u>                       | 1.75                     | 0.0018 | <b>0.0318</b> |
| C5 GO Cellular Component | <u>GOCC_COPI_COATED_VESICLE_MEMBRANE</u>                        | 1.75                     | 0.0056 | <b>0.0321</b> |
| C2 Reactome pathway      | <u>REACTOME_INTERLEUKIN_RECEPTOR_SHC_SIGNALING</u>              | 1.75                     | 0.0073 | <b>0.0321</b> |
| C2 PID pathway           | <u>PID_MET_PATHWAY</u>                                          | 1.75                     | 0.0018 | <b>0.0322</b> |
| C2 Reactome pathway      | <u>REACTOME_FATTY_ACYL_COA_BIOSYNTHESIS</u>                     | 1.75                     | 0.0036 | <b>0.0322</b> |
| C2 Reactome pathway      | <u>REACTOME_RAF_ACTIVATION</u>                                  | 1.75                     | 0.0019 | <b>0.0324</b> |
| C2 PID pathway           | <u>PID_ECADHERIN_NASCENT_AJ_PATHWAY</u>                         | 1.75                     | 0.0018 | <b>0.0324</b> |
| C2 Reactome pathway      | <u>REACTOME_RHO_GTPASES_ACTIVATE_NADPH_OXIDASES</u>             | 1.74                     | 0.0058 | <b>0.0327</b> |
| C2 Reactome pathway      | <u>REACTOME_PURINERGIC_SIGNALING_IN_LEISHMANIASIS_INFECTION</u> | 1.74                     | 0.0091 | <b>0.0327</b> |
| C5 GO Biological Process | <u>GOBP_RNA_LOCALIZATION</u>                                    | 1.74                     | 0.0000 | <b>0.0328</b> |
| C5 GO Biological Process | <u>GOBP_LATE_ENDOSOME_TO_LYSOSOME_TRANSPORT</u>                 | 1.74                     | 0.0038 | <b>0.0328</b> |
| C5 GO Biological Process | <u>GOBP_REGULATION_OF_SUPEROXIDE_ANION_GENERATION</u>           | 1.74                     | 0.0133 | <b>0.0328</b> |
| C2 Reactome pathway      | <u>REACTOME_PROGRAMMED_CELL_DEATH</u>                           | 1.74                     | 0.0000 | <b>0.0328</b> |
| C2 BioCarta pathway      | <u>BIOCARTA_RHO_PATHWAY</u>                                     | 1.74                     | 0.0072 | <b>0.0328</b> |
| C2 BioCarta pathway      | <u>BIOCARTA_MTOR_PATHWAY</u>                                    | 1.74                     | 0.0076 | <b>0.0328</b> |
| C5 GO Biological Process | <u>GOBP_POSITIVE_REGULATION_OF_DEPHOSPHORYLATION</u>            | 1.74                     | 0.0000 | <b>0.0328</b> |
| C5 GO Biological Process | <u>GOBP_POSITIVE_REGULATION_OF_IMMUNE_RESPONSE</u>              | 1.74                     | 0.0000 | <b>0.0328</b> |
| C5 GO Molecular Function | <u>GOMF_PHOSPHOTYROSINE_RESIDUE_BINDING</u>                     | 1.74                     | 0.0034 | <b>0.0328</b> |
| C5 GO Biological Process | <u>GOBP_MONOCARBOXYLIC_ACID_CATABOLIC_PROCESS</u>               | 1.74                     | 0.0000 | <b>0.0329</b> |
| C5 GO Biological Process | <u>GOBP_PROTEIN_FOLDING</u>                                     | 1.74                     | 0.0000 | <b>0.0329</b> |
| C2 Reactome pathway      | <u>REACTOME_TOLL LIKE RECEPTOR CASCADES</u>                     | 1.74                     | 0.0000 | <b>0.0329</b> |
| C5 GO Biological Process | <u>GOBP_REGULATION_OF_CELLULAR_PROTEIN_CATABOLIC_PROCESS</u>    | 1.74                     | 0.0000 | <b>0.0329</b> |
| C5 GO Molecular Function | <u>GOMF_LIPID_TRANSFER_ACTIVITY</u>                             | 1.74                     | 0.0018 | <b>0.0329</b> |
| C2 KEGG pathway          | <u>KEGG_PRIMARY_IMMUNODEFICIENCY</u>                            | 1.74                     | 0.0018 | <b>0.0329</b> |
| C5 GO Biological Process | <u>GOBP_PROTEIN_IMPORT</u>                                      | 1.74                     | 0.0000 | <b>0.0330</b> |

|                          |                                                                          |      |        |               |
|--------------------------|--------------------------------------------------------------------------|------|--------|---------------|
| C5 GO Biological Process | <u>GOBP NEGATIVE REGULATION OF DNA REPAIR</u>                            | 1.74 | 0.0072 | <b>0.0331</b> |
| C5 GO Biological Process | <u>GOBP PEROXISOMAL TRANSPORT</u>                                        | 1.74 | 0.0074 | <b>0.0331</b> |
| C2 PID pathway           | <u>PID ERBB1 DOWNSTREAM PATHWAY</u>                                      | 1.74 | 0.0000 | <b>0.0332</b> |
| C5 GO Biological Process | <u>GOBP RESPONSE TO ENDOPLASMIC RETICULUM STRESS</u>                     | 1.74 | 0.0000 | <b>0.0332</b> |
| C2 WikiPathways pathway  | <u>WP EBSTEINBARR VIRUS LMP1 SIGNALING</u>                               | 1.74 | 0.0104 | <b>0.0332</b> |
| C5 GO Molecular Function | <u>GOMF MITOGEN ACTIVATED PROTEIN KINASE BINDING</u>                     | 1.74 | 0.0078 | <b>0.0333</b> |
| C5 GO Biological Process | <u>GOBP DOUBLE STRAND BREAK REPAIR VIA NONHOMOLOGOUS END JOINING</u>     | 1.74 | 0.0017 | <b>0.0334</b> |
| C2 BioCarta pathway      | <u>BIOCARTA HIVNEF PATHWAY</u>                                           | 1.74 | 0.0000 | <b>0.0334</b> |
| C2 PID pathway           | <u>PID IGF1 PATHWAY</u>                                                  | 1.74 | 0.0093 | <b>0.0337</b> |
| C5 GO Biological Process | <u>GOBP REGULATION OF PATTERN RECOGNITION RECEPTOR SIGNALING PATHWAY</u> | 1.74 | 0.0000 | <b>0.0339</b> |
| C5 GO Molecular Function | <u>GOMF NON MEMBRANE SPANNING PROTEIN TYROSINE KINASE ACTIVITY</u>       | 1.74 | 0.0017 | <b>0.0339</b> |
| C2 KEGG pathway          | <u>KEGG HUNTINGTONS DISEASE</u>                                          | 1.74 | 0.0000 | <b>0.0341</b> |
| C5 GO Biological Process | <u>GOBP REGULATION OF RESPONSE TO DNA DAMAGE STIMULUS</u>                | 1.74 | 0.0000 | <b>0.0341</b> |

| Group                    | Gene Set Name                                                         | NES                      | p      | FDR q         |
|--------------------------|-----------------------------------------------------------------------|--------------------------|--------|---------------|
|                          |                                                                       | post, trained vs control |        |               |
| C5 GO Biological Process | <u>GOBP PROTEIN TRANSMEMBRANE IMPORT INTO INTRACELLULAR ORGANELLE</u> | 1.74                     | 0.0054 | <b>0.0341</b> |
| C5 GO Biological Process | <u>GOBP RIBONUCLEOSIDE TRIPHOSPHATE BIOSYNTHETIC PROCESS</u>          | 1.73                     | 0.0036 | <b>0.0342</b> |
| C2 PID pathway           | <u>PID AR NONGENOMIC PATHWAY</u>                                      | 1.73                     | 0.0019 | <b>0.0342</b> |
| C2 WikiPathways pathway  | <u>WP WNT SIGNALING PATHWAY</u>                                       | 1.73                     | 0.0072 | <b>0.0346</b> |
| C5 GO Biological Process | <u>GOBP CARDIOLIPIN METABOLIC PROCESS</u>                             | 1.73                     | 0.0150 | <b>0.0347</b> |
| C5 GO Molecular Function | <u>GOMF UBIQUITIN LIKE PROTEIN LIGASE BINDING</u>                     | 1.73                     | 0.0000 | <b>0.0348</b> |
| C5 GO Biological Process | <u>GOBP POSITIVE REGULATION OF INTERLEUKIN 2 PRODUCTION</u>           | 1.73                     | 0.0091 | <b>0.0348</b> |
| C2 BioCarta pathway      | <u>BIOCARTA TOLL PATHWAY</u>                                          | 1.73                     | 0.0074 | <b>0.0348</b> |
| C2 Reactome pathway      | <u>REACTOME RAB GEFS EXCHANGE GTP FOR GDP ON RABS</u>                 | 1.73                     | 0.0000 | <b>0.0348</b> |
| C5 GO Biological Process | <u>GOBP TRANSCRIPTION BY RNA POLYMERASE III</u>                       | 1.73                     | 0.0036 | <b>0.0348</b> |
| C2 Reactome pathway      | <u>REACTOME CLASS I PEROXISOMAL MEMBRANE PROTEIN IMPORT</u>           | 1.73                     | 0.0093 | <b>0.0348</b> |
| C2 KEGG pathway          | <u>KEGG INOSITOL PHOSPHATE METABOLISM</u>                             | 1.73                     | 0.0035 | <b>0.0349</b> |

|                          |                                                                                |      |        |               |
|--------------------------|--------------------------------------------------------------------------------|------|--------|---------------|
| C5 GO Cellular Component | <u>GOCC PROTON TRANSPORTING TWO SECTOR ATPASE COMPLEX</u>                      | 1.73 | 0.0018 | <b>0.0349</b> |
| C5 GO Cellular Component | <u>GOCC PERICENTRIOLAR MATERIAL</u>                                            | 1.73 | 0.0074 | <b>0.0349</b> |
| C5 GO Biological Process | <u>GOBP CELLULAR RESPONSE TO EXOGENOUS DSRNA</u>                               | 1.73 | 0.0039 | <b>0.0349</b> |
| C2 Reactome pathway      | <u>REACTOME MITOCHONDRIAL BIOGENESIS</u>                                       | 1.73 | 0.0018 | <b>0.0352</b> |
| C5 GO Biological Process | <u>GOBP POSITIVE REGULATION OF ANTIGEN RECEPTOR MEDIATED SIGNALING PATHWAY</u> | 1.73 | 0.0053 | <b>0.0353</b> |
| C5 GO Cellular Component | <u>GOCC U2 SNRNP</u>                                                           | 1.73 | 0.0036 | <b>0.0353</b> |
| C2 WikiPathways pathway  | <u>WP MEASLES VIRUS INFECTION</u>                                              | 1.73 | 0.0000 | <b>0.0353</b> |
| C5 GO Biological Process | <u>GOBP RRNA METABOLIC PROCESS</u>                                             | 1.73 | 0.0000 | <b>0.0353</b> |
| C2 Reactome pathway      | <u>REACTOME PHOSPHORYLATION OF THE APC_C</u>                                   | 1.73 | 0.0054 | <b>0.0354</b> |
| C2 PID pathway           | <u>PID CXCR4 PATHWAY</u>                                                       | 1.73 | 0.0017 | <b>0.0354</b> |
| C2 WikiPathways pathway  | <u>WP CELL CYCLE</u>                                                           | 1.73 | 0.0000 | <b>0.0354</b> |
| C2 Reactome pathway      | <u>REACTOME TELOMERE MAINTENANCE</u>                                           | 1.73 | 0.0017 | <b>0.0354</b> |
| C2 Reactome pathway      | <u>REACTOME SIGNALING BY NOTCH</u>                                             | 1.73 | 0.0000 | <b>0.0354</b> |
| C2 WikiPathways pathway  | <u>WP TRANSLATION FACTORS</u>                                                  | 1.73 | 0.0036 | <b>0.0355</b> |
| C5 GO Biological Process | <u>GOBP ENDOSOMAL TRANSPORT</u>                                                | 1.73 | 0.0000 | <b>0.0355</b> |
| C2 KEGG pathway          | <u>KEGG NON SMALL CELL LUNG CANCER</u>                                         | 1.73 | 0.0017 | <b>0.0355</b> |
| C5 GO Biological Process | <u>GOBP POSITIVE REGULATION OF CELLULAR PROTEIN CATABOLIC PROCESS</u>          | 1.73 | 0.0000 | <b>0.0355</b> |
| C5 GO Molecular Function | <u>GOMF UBIQUITIN LIKE PROTEIN SPECIFIC PROTEASE ACTIVITY</u>                  | 1.72 | 0.0000 | <b>0.0362</b> |
| C2 Reactome pathway      | <u>REACTOME ACTIVATION OF GENE EXPRESSION BY SREBF SREBP</u>                   | 1.72 | 0.0018 | <b>0.0362</b> |
| C2 BioCarta pathway      | <u>BIOCARTA GH PATHWAY</u>                                                     | 1.72 | 0.0074 | <b>0.0362</b> |
| C2 Reactome pathway      | <u>REACTOME AUF1 HNRNP D0 BINDS AND DESTABILIZES MRNA</u>                      | 1.72 | 0.0020 | <b>0.0363</b> |
| C5 GO Biological Process | <u>GOBP NEGATIVE REGULATION OF TRANSFERASE ACTIVITY</u>                        | 1.72 | 0.0000 | <b>0.0363</b> |
| C2 Reactome pathway      | <u>REACTOME GLYCOPHINGOLIPID METABOLISM</u>                                    | 1.72 | 0.0089 | <b>0.0363</b> |
| C5 GO Biological Process | <u>GOBP CELL ACTIVATION INVOLVED IN IMMUNE RESPONSE</u>                        | 1.72 | 0.0000 | <b>0.0363</b> |
| C5 GO Biological Process | <u>GOBP MYELOID LEUKOCYTE MEDIATED IMMUNITY</u>                                | 1.72 | 0.0034 | <b>0.0364</b> |
| C5 GO Biological Process | <u>GOBP ACTIVATION OF INNATE IMMUNE RESPONSE</u>                               | 1.72 | 0.0000 | <b>0.0364</b> |
| C2 Reactome pathway      | <u>REACTOME PLATELET ACTIVATION SIGNALING AND AGGREGATION</u>                  | 1.72 | 0.0000 | <b>0.0364</b> |
| C5 GO Biological Process | <u>GOBP REGULATION OF HISTONE H3 K9 METHYLATION</u>                            | 1.72 | 0.0129 | <b>0.0364</b> |
| C5 GO Biological Process | <u>GOBP AUTOPHAGY OF MITOCHONDRION</u>                                         | 1.72 | 0.0000 | <b>0.0365</b> |
| C5 GO Biological Process | <u>GOBP PROTEIN POLYUBIQUITINATION</u>                                         | 1.72 | 0.0000 | <b>0.0365</b> |

| Group                    | Gene Set Name                                                                          | NES                      | p      | FDR q         |
|--------------------------|----------------------------------------------------------------------------------------|--------------------------|--------|---------------|
|                          |                                                                                        | post, trained vs control |        |               |
| C5 GO Biological Process | <u>GOBP MITOTIC INTRA S DNA DAMAGE CHECKPOINT SIGNALING</u>                            | 1.72                     | 0.0060 | <b>0.0366</b> |
| C5 GO Biological Process | <u>GOBP DNA DOUBLE STRAND BREAK PROCESSING</u>                                         | 1.72                     | 0.0055 | <b>0.0368</b> |
| C2 Reactome pathway      | <u>REACTOME CD28 CO STIMULATION</u>                                                    | 1.72                     | 0.0125 | <b>0.0368</b> |
| C5 GO Biological Process | <u>GOBP COPII COATED VESICLE CARGO LOADING</u>                                         | 1.72                     | 0.0113 | <b>0.0368</b> |
| C5 GO Biological Process | <u>GOBP NUCLEOBASE BIOSYNTHETIC PROCESS</u>                                            | 1.72                     | 0.0096 | <b>0.0369</b> |
| C2 PID pathway           | <u>PID ATR PATHWAY</u>                                                                 | 1.72                     | 0.0075 | <b>0.0369</b> |
| C2 Reactome pathway      | <u>REACTOME REGULATION OF TP53 ACTIVITY THROUGH PHOSPHORYLATION</u>                    | 1.72                     | 0.0017 | <b>0.0369</b> |
| C5 GO Biological Process | <u>GOBP PROTEIN QUALITY CONTROL FOR MISFOLDED OR INCOMPLETELY SYNTHESIZED PROTEINS</u> | 1.72                     | 0.0055 | <b>0.0370</b> |
| C5 GO Biological Process | <u>GOBP REGULATION OF PROTEIN CATABOLIC PROCESS</u>                                    | 1.72                     | 0.0000 | <b>0.0370</b> |
| C5 GO Molecular Function | <u>GOMF S ACYLTRANSFERASE ACTIVITY</u>                                                 | 1.72                     | 0.0093 | <b>0.0370</b> |
| C5 GO Biological Process | <u>GOBP CELLULAR RESPONSE TO BIOTIC STIMULUS</u>                                       | 1.72                     | 0.0000 | <b>0.0370</b> |
| C5 GO Biological Process | <u>GOBP TUMOR NECROSIS FACTOR MEDIATED SIGNALING PATHWAY</u>                           | 1.72                     | 0.0017 | <b>0.0370</b> |
| C5 GO Biological Process | <u>GOBP LEUKOCYTE MEDIATED IMMUNITY</u>                                                | 1.72                     | 0.0000 | <b>0.0370</b> |
| C5 GO Biological Process | <u>GOBP ERAD PATHWAY</u>                                                               | 1.72                     | 0.0017 | <b>0.0371</b> |
| C2 PID pathway           | <u>PID TXA2PATHWAY</u>                                                                 | 1.72                     | 0.0018 | <b>0.0371</b> |
| C2 Reactome pathway      | <u>REACTOME RHOC GTPASE CYCLE</u>                                                      | 1.72                     | 0.0000 | <b>0.0371</b> |
| Hallmark                 | <u>HALLMARK REACTIVE OXYGEN SPECIES PATHWAY</u>                                        | 1.72                     | 0.0018 | <b>0.0371</b> |
| C2 Reactome pathway      | <u>REACTOME PROCESSING OF DNA DOUBLE STRAND BREAK ENDS</u>                             | 1.72                     | 0.0017 | <b>0.0371</b> |
| C2 WikiPathways pathway  | <u>WP APOPTOSIS</u>                                                                    | 1.72                     | 0.0000 | <b>0.0371</b> |
| C2 KEGG pathway          | <u>KEGG VASOPRESSIN REGULATED WATER REABSORPTION</u>                                   | 1.71                     | 0.0037 | <b>0.0373</b> |
| C5 GO Biological Process | <u>GOBP RNA POLYADENYLATION</u>                                                        | 1.71                     | 0.0035 | <b>0.0373</b> |
| C2 BioCarta pathway      | <u>BIOCARTA LONGEVITY PATHWAY</u>                                                      | 1.71                     | 0.0073 | <b>0.0374</b> |
| C2 KEGG pathway          | <u>KEGG NOTCH SIGNALING PATHWAY</u>                                                    | 1.71                     | 0.0036 | <b>0.0375</b> |
| C2 Reactome pathway      | <u>REACTOME G1 S DNA DAMAGE CHECKPOINTS</u>                                            | 1.71                     | 0.0052 | <b>0.0376</b> |
| C5 GO Biological Process | <u>GOBP FC GAMMA RECEPTOR SIGNALING PATHWAY</u>                                        | 1.71                     | 0.0037 | <b>0.0376</b> |
| C5 GO Biological Process | <u>GOBP POSITIVE REGULATION OF TRANSLATIONAL INITIATION</u>                            | 1.71                     | 0.0072 | <b>0.0377</b> |
| C5 GO Biological Process | <u>GOBP REGULATION OF HISTONE H3 K4 METHYLATION</u>                                    | 1.71                     | 0.0037 | <b>0.0378</b> |
| C5 GO Molecular Function | <u>GOMF PROMOTER SPECIFIC CHROMATIN BINDING</u>                                        | 1.71                     | 0.0017 | <b>0.0378</b> |
| C2 Reactome pathway      | <u>REACTOME CD28 DEPENDENT PI3K AKT SIGNALING</u>                                      | 1.71                     | 0.0098 | <b>0.0378</b> |



|                          |                                                                                        |      |        |               |
|--------------------------|----------------------------------------------------------------------------------------|------|--------|---------------|
| C5 GO Biological Process | <u>GOBP NEGATIVE REGULATION OF PRODUCTION OF MOLECULAR MEDIATOR OF IMMUNE RESPONSE</u> | 1.71 | 0.0018 | <b>0.0378</b> |
| C5 GO Biological Process | <u>GOBP FATTY ACID CATABOLIC PROCESS</u>                                               | 1.71 | 0.0000 | <b>0.0379</b> |
| C5 GO Cellular Component | <u>GOCC SPECIFIC GRANULE LUMEN</u>                                                     | 1.71 | 0.0073 | <b>0.0379</b> |
| C5 GO Biological Process | <u>GOBP REGULATION OF DEPHOSPHORYLATION</u>                                            | 1.71 | 0.0000 | <b>0.0380</b> |
| C2 Reactome pathway      | <u>REACTOME TRANSPORT OF MATURE TRANSCRIPT TO CYTOPLASM</u>                            | 1.71 | 0.0017 | <b>0.0381</b> |
| C5 GO Cellular Component | <u>GOCC UBIQUITIN LIGASE COMPLEX</u>                                                   | 1.71 | 0.0000 | <b>0.0382</b> |
| C2 Reactome pathway      | <u>REACTOME DNA DOUBLE STRAND BREAK RESPONSE</u>                                       | 1.71 | 0.0056 | <b>0.0382</b> |
| C5 GO Biological Process | <u>GOBP REGULATION OF T CELL RECEPTOR SIGNALING PATHWAY</u>                            | 1.71 | 0.0000 | <b>0.0385</b> |
| C5 GO Molecular Function | <u>GOMF PEPTIDASE ACTIVATOR ACTIVITY INVOLVED IN APOPTOTIC PROCESS</u>                 | 1.71 | 0.0038 | <b>0.0385</b> |
| C2 Reactome pathway      | <u>REACTOME REGULATION OF RAS BY GAPS</u>                                              | 1.71 | 0.0018 | <b>0.0385</b> |
| C5 GO Molecular Function | <u>GOMF ENZYME ACTIVATOR ACTIVITY</u>                                                  | 1.71 | 0.0000 | <b>0.0386</b> |
| C5 GO Molecular Function | <u>GOMF OXIDOREDUCTASE ACTIVITY ACTING ON THE CH<sub>2</sub> GROUP OF DONORS</u>       | 1.71 | 0.0109 | <b>0.0387</b> |
| C2 Reactome pathway      | <u>REACTOME GPVI MEDIATED ACTIVATION CASCADE</u>                                       | 1.71 | 0.0145 | <b>0.0387</b> |

| Group                    | Gene Set Name                                                   | NES                      | p      | FDR q         |
|--------------------------|-----------------------------------------------------------------|--------------------------|--------|---------------|
|                          |                                                                 | post, trained vs control |        |               |
| C5 GO Biological Process | <u>GOBP REGULATION OF MYELOID LEUKOCYTE MEDIATED IMMUNITY</u>   | 1.71                     | 0.0000 | <b>0.0388</b> |
| C2 Reactome pathway      | <u>REACTOME FOXO MEDIATED TRANSCRIPTION</u>                     | 1.71                     | 0.0018 | <b>0.0388</b> |
| C2 Reactome pathway      | <u>REACTOME IRE1ALPHA ACTIVATES CHAPERONES</u>                  | 1.71                     | 0.0000 | <b>0.0388</b> |
| C2 BioCarta pathway      | <u>BIOCARTA KERATINOCYTE PATHWAY</u>                            | 1.70                     | 0.0055 | <b>0.0390</b> |
| C5 GO Biological Process | <u>GOBP HISTONE UBIQUITINATION</u>                              | 1.70                     | 0.0035 | <b>0.0391</b> |
| C2 WikiPathways pathway  | <u>WP KIT RECEPTOR SIGNALING PATHWAY</u>                        | 1.70                     | 0.0000 | <b>0.0391</b> |
| C2 Reactome pathway      | <u>REACTOME RETROGRADE TRANSPORT AT THE TRANS GOLGI NETWORK</u> | 1.70                     | 0.0090 | <b>0.0391</b> |
| C5 GO Biological Process | <u>GOBP VACUOLE ORGANIZATION</u>                                | 1.70                     | 0.0017 | <b>0.0391</b> |
| C5 GO Biological Process | <u>GOBP REGULATION OF NUCLEASE ACTIVITY</u>                     | 1.70                     | 0.0092 | <b>0.0391</b> |
| C2 Reactome pathway      | <u>REACTOME RRNA PROCESSING</u>                                 | 1.70                     | 0.0000 | <b>0.0391</b> |
| C2 WikiPathways pathway  | <u>WP VASOPRESSINREGULATED WATER REABSORPTION</u>               | 1.70                     | 0.0056 | <b>0.0392</b> |
| C5 GO Biological Process | <u>GOBP ESTABLISHMENT OF PROTEIN LOCALIZATION TO TELOMERE</u>   | 1.70                     | 0.0097 | <b>0.0393</b> |
| C2 KEGG pathway          | <u>KEGG PHOSPHATIDYLINOSITOL SIGNALING SYSTEM</u>               | 1.70                     | 0.0017 | <b>0.0394</b> |
| C2 Reactome pathway      | <u>REACTOME DAP12 INTERACTIONS</u>                              | 1.70                     | 0.0058 | <b>0.0394</b> |

|                          |                                                                                               |      |        |               |
|--------------------------|-----------------------------------------------------------------------------------------------|------|--------|---------------|
| C5 GO Biological Process | <u>GOBP POSITIVE REGULATION OF PROTEOLYSIS INVOLVED IN CELLULAR PROTEIN CATABOLIC PROCESS</u> | 1.70 | 0.0000 | <b>0.0394</b> |
| C5 GO Cellular Component | <u>GOCC ENDOLYSOSOME</u>                                                                      | 1.70 | 0.0055 | <b>0.0394</b> |
| C5 GO Biological Process | <u>GOBP TAIL ANCHORED MEMBRANE PROTEIN INSERTION INTO ER MEMBRANE</u>                         | 1.70 | 0.0075 | <b>0.0395</b> |
| Hallmark                 | <u>HALLMARK UNFOLDED PROTEIN RESPONSE</u>                                                     | 1.70 | 0.0017 | <b>0.0395</b> |
| C2 Reactome pathway      | <u>REACTOME DEADENYLATION DEPENDENT MRNA DECA</u><br><u>Y</u>                                 | 1.70 | 0.0018 | <b>0.0396</b> |
| C2 KEGG pathway          | <u>KEGG ENDOMETRIAL CANCER</u>                                                                | 1.70 | 0.0092 | <b>0.0396</b> |
| C2 PID pathway           | <u>PID EPO PATHWAY</u>                                                                        | 1.70 | 0.0037 | <b>0.0397</b> |
| C5 GO Biological Process | <u>GOBP POSITIVE REGULATION OF PROTEIN LOCALIZATION TO NUCLEUS</u>                            | 1.70 | 0.0000 | <b>0.0400</b> |
| C5 GO Biological Process | <u>GOBP T CELL PROLIFERATION</u>                                                              | 1.70 | 0.0000 | <b>0.0400</b> |
| C5 GO Biological Process | <u>GOBP REGULATION OF REACTIVE OXYGEN SPECIES METABOLIC PROCESS</u>                           | 1.70 | 0.0000 | <b>0.0401</b> |
| C2 PID pathway           | <u>PID NCADHERIN PATHWAY</u>                                                                  | 1.70 | 0.0055 | <b>0.0401</b> |
| C2 BioCarta pathway      | <u>BIOCARTA IL7 PATHWAY</u>                                                                   | 1.70 | 0.0078 | <b>0.0401</b> |
| C2 PID pathway           | <u>PID SMAD2 3NUCLEAR PATHWAY</u>                                                             | 1.70 | 0.0017 | <b>0.0403</b> |
| C2 Reactome pathway      | <u>REACTOME HIV TRANSCRIPTION INITIATION</u>                                                  | 1.70 | 0.0051 | <b>0.0405</b> |
| C2 Reactome pathway      | <u>REACTOME NONHOMOLOGOUS END JOINING NHEJ</u>                                                | 1.70 | 0.0057 | <b>0.0405</b> |
| C5 GO Molecular Function | <u>GOMF GTPASE BINDING</u>                                                                    | 1.70 | 0.0000 | <b>0.0405</b> |
| C5 GO Cellular Component | <u>GOCC ORGANELLE INNER MEMBRANE</u>                                                          | 1.70 | 0.0000 | <b>0.0409</b> |
| C5 GO Biological Process | <u>GOBP NCRNA TRANSCRIPTION</u>                                                               | 1.69 | 0.0051 | <b>0.0412</b> |
| C5 GO Biological Process | <u>GOBP TRANSLATIONAL ELONGATION</u>                                                          | 1.69 | 0.0056 | <b>0.0412</b> |
| C2 Reactome pathway      | <u>REACTOME SIGNALING BY CSF3 G CSF</u>                                                       | 1.69 | 0.0071 | <b>0.0412</b> |
| C5 GO Biological Process | <u>GOBP POSITIVE REGULATION OF PROTEIN CATABOLIC PROCESS</u>                                  | 1.69 | 0.0000 | <b>0.0416</b> |
| C5 GO Biological Process | <u>GOBP MATURATION OF LSU RRNA</u>                                                            | 1.69 | 0.0130 | <b>0.0416</b> |
| C5 GO Biological Process | <u>GOBP NEGATIVE REGULATION OF PEPTIDYL TYROSINE PHOSPHORYLATION</u>                          | 1.69 | 0.0037 | <b>0.0417</b> |
| C2 BioCarta pathway      | <u>BIOCARTA TGFB PATHWAY</u>                                                                  | 1.69 | 0.0055 | <b>0.0417</b> |
| C5 GO Cellular Component | <u>GOCC MEMBRANE COAT</u>                                                                     | 1.69 | 0.0036 | <b>0.0417</b> |
| C2 BioCarta pathway      | <u>BIOCARTA TNFR1 PATHWAY</u>                                                                 | 1.69 | 0.0056 | <b>0.0417</b> |
| C2 BioCarta pathway      | <u>BIOCARTA GLEEVEC PATHWAY</u>                                                               | 1.69 | 0.0072 | <b>0.0417</b> |
| C5 GO Biological Process | <u>GOBP TRANSCRIPTION INITIATION FROM RNA POLYMERASE II PROMOTER</u>                          | 1.69 | 0.0000 | <b>0.0417</b> |

| Group | Gene Set Name | NES                      | p | FDR q |
|-------|---------------|--------------------------|---|-------|
|       |               | post, trained vs control |   |       |

|                          |                                                                                                   |      |        |               |
|--------------------------|---------------------------------------------------------------------------------------------------|------|--------|---------------|
| C2 PID pathway           | <u>PID_RHOA_REG_PATHWAY</u>                                                                       | 1.69 | 0.0053 | <b>0.0418</b> |
| C2 WikiPathways pathway  | <u>WP_PRION_DISEASE_PATHWAY</u>                                                                   | 1.69 | 0.0130 | <b>0.0420</b> |
| C2 WikiPathways pathway  | <u>WP_DNA_DAMAGE_RESPONSE_ONLY_ATM_DEPENDENT</u>                                                  | 1.69 | 0.0032 | <b>0.0421</b> |
| C2 Reactome pathway      | <u>REACTOME_SCF_SKP2_MEDIATED_DEGRADATION_OF_P27_P21</u>                                          | 1.69 | 0.0018 | <b>0.0423</b> |
| C5 GO Biological Process | <u>GOBP_I_KAPPAB_KINASE_NF_KAPPAB_SIGNALING</u>                                                   | 1.69 | 0.0000 | <b>0.0424</b> |
| C2 Reactome pathway      | <u>REACTOME_TRANSLATION</u>                                                                       | 1.69 | 0.0000 | <b>0.0425</b> |
| C5 GO Biological Process | <u>GOBP_ER_NUCLEUS_SIGNALING_PATHWAY</u>                                                          | 1.69 | 0.0018 | <b>0.0426</b> |
| C2 Reactome pathway      | <u>REACTOME_APOPTOSIS</u>                                                                         | 1.69 | 0.0000 | <b>0.0427</b> |
| C5 GO Biological Process | <u>GOBP_PEPTIDYL_LYSINE_METHYLATION</u>                                                           | 1.69 | 0.0000 | <b>0.0427</b> |
| C5 GO Biological Process | <u>GOBP_MAST_CELL_ACTIVATION</u>                                                                  | 1.68 | 0.0017 | <b>0.0428</b> |
| C2 Reactome pathway      | <u>REACTOME_REGULATION_OF_TP53_EXPRESSION_AND_DEGRADATION</u>                                     | 1.69 | 0.0210 | <b>0.0428</b> |
| C5 GO Biological Process | <u>GOBP_ANTIGEN_PROCESSING_AND_PRESENTATION_OF_PEPTIDE_ANTIGEN_VIA_MHC_CLASS_I</u>                | 1.69 | 0.0286 | <b>0.0429</b> |
| C2 KEGG pathway          | <u>KEGG_CELL_CYCLE</u>                                                                            | 1.68 | 0.0000 | <b>0.0429</b> |
| C5 GO Biological Process | <u>GOBP_RESPONSE_TO_PROSTAGLANDIN_E</u>                                                           | 1.69 | 0.0071 | <b>0.0429</b> |
| Hallmark                 | <u>HALLMARK_MYC_TARGETS_V2</u>                                                                    | 1.69 | 0.0074 | <b>0.0429</b> |
| C5 GO Biological Process | <u>GOBP_PHOSPHOLIPID_CATABOLIC_PROCESS</u>                                                        | 1.69 | 0.0054 | <b>0.0429</b> |
| C2 Reactome pathway      | <u>REACTOME_JNK_C_JUN_KINASES_PHOSPHORYLATION_AND_ACTIVATION_MEDIATED_BY_ACTIVATED_HUMAN_TAK1</u> | 1.69 | 0.0113 | <b>0.0429</b> |
| C5 GO Biological Process | <u>GOBP_NATURAL_KILLER_CELL_ACTIVATION</u>                                                        | 1.68 | 0.0017 | <b>0.0429</b> |
| C2 Reactome pathway      | <u>REACTOME_CONSTITUTIVE_SIGNALING_BY_AKT1_E17K_IN_CANCER</u>                                     | 1.69 | 0.0055 | <b>0.0429</b> |
| C5 GO Molecular Function | <u>GOMF_MHC_CLASS_I_PROTEIN_BINDING</u>                                                           | 1.69 | 0.0092 | <b>0.0429</b> |
| C2 Reactome pathway      | <u>REACTOME_CYTOSOLIC_TRNA_AMINOACYLATION</u>                                                     | 1.69 | 0.0167 | <b>0.0429</b> |
| C2 Reactome pathway      | <u>REACTOME_RESPIRATORY_ELECTRON_TRANSPORT</u>                                                    | 1.69 | 0.0017 | <b>0.0430</b> |
| C5 GO Biological Process | <u>GOBP_PROTEIN_STABILIZATION</u>                                                                 | 1.69 | 0.0000 | <b>0.0430</b> |
| C2 Reactome pathway      | <u>REACTOME_SIGNALING_BY_TGFB_FAMILY_MEMBERS</u>                                                  | 1.68 | 0.0034 | <b>0.0431</b> |
| C5 GO Biological Process | <u>GOBP_POSITIVE_REGULATION_OF_TELOMERE_MAINTENANCE</u>                                           | 1.68 | 0.0073 | <b>0.0431</b> |
| C5 GO Biological Process | <u>GOBP_REGULATION_OF_LYMPHOCYTE_DIFFERENTIATION</u>                                              | 1.68 | 0.0000 | <b>0.0432</b> |
| C2 BioCarta pathway      | <u>BIOCARTA_IL2_PATHWAY</u>                                                                       | 1.68 | 0.0145 | <b>0.0432</b> |
| C5 GO Cellular Component | <u>GOCC_PML_BODY</u>                                                                              | 1.68 | 0.0000 | <b>0.0432</b> |
| C2 Reactome pathway      | <u>REACTOME_RHO_GTPASE_EFFECTORS</u>                                                              | 1.68 | 0.0000 | <b>0.0432</b> |
| C2 WikiPathways pathway  | <u>WP_FOLLICLE_STIMULATING_HORMONE_FSH_SIGNALING_PATHWAY</u>                                      | 1.68 | 0.0071 | <b>0.0432</b> |
| C5 GO Molecular Function | <u>GOMF_GTPASE_ACTIVATOR_ACTIVITY</u>                                                             | 1.68 | 0.0000 | <b>0.0432</b> |

|                          |                                                                   |      |        |               |
|--------------------------|-------------------------------------------------------------------|------|--------|---------------|
| C2 WikiPathways pathway  | <u>WP GLYCOGEN SYNTHESIS AND DEGRADATION</u>                      | 1.68 | 0.0092 | <b>0.0432</b> |
| C5 GO Cellular Component | <u>GOCC PROTEIN ACETYLTRANSFERASE COMPLEX</u>                     | 1.68 | 0.0000 | <b>0.0433</b> |
| C5 GO Biological Process | <u>GOBP PHAGOCYTOSIS</u>                                          | 1.68 | 0.0016 | <b>0.0433</b> |
| C5 GO Biological Process | <u>GOBP INNATE IMMUNE RESPONSE ACTIVATING SIGNAL TRANSDUCTION</u> | 1.68 | 0.0092 | <b>0.0433</b> |
| C2 PID pathway           | <u>PID CASPASE PATHWAY</u>                                        | 1.68 | 0.0036 | <b>0.0433</b> |
| C2 Reactome pathway      | <u>REACTOME NUCLEAR ENVELOPE REASSEMBLY</u>                       | 1.68 | 0.0000 | <b>0.0433</b> |
| C5 GO Cellular Component | <u>GOCC ENDOPEPTIDASE COMPLEX</u>                                 | 1.68 | 0.0037 | <b>0.0434</b> |
| C5 GO Biological Process | <u>GOBP POSITIVE REGULATION OF DNA TRANSCRIPTION INITIATION</u>   | 1.68 | 0.0018 | <b>0.0434</b> |
| C2 Reactome pathway      | <u>REACTOME ZBP1 DAI MEDIATED INDUCTION OF TYPE I IFNS</u>        | 1.68 | 0.0092 | <b>0.0434</b> |
| C2 PID pathway           | <u>PID TRAIL PATHWAY</u>                                          | 1.68 | 0.0132 | <b>0.0434</b> |
| C5 GO Cellular Component | <u>GOCC NUCLEAR SPECK</u>                                         | 1.68 | 0.0000 | <b>0.0435</b> |

| Group                    | Gene Set Name                                                                    | NES                      | p      | FDR q         |
|--------------------------|----------------------------------------------------------------------------------|--------------------------|--------|---------------|
|                          |                                                                                  | post, trained vs control |        |               |
| C5 GO Biological Process | <u>GOBP B CELL PROLIFERATION</u>                                                 | 1.68                     | 0.0018 | <b>0.0435</b> |
| C2 Reactome pathway      | <u>REACTOME PROTEIN UBIQUITINATION</u>                                           | 1.68                     | 0.0018 | <b>0.0435</b> |
| C5 GO Biological Process | <u>GOBP IMPORT INTO NUCLEUS</u>                                                  | 1.68                     | 0.0017 | <b>0.0436</b> |
| C2 KEGG pathway          | <u>KEGG GRAFT VERSUS HOST DISEASE</u>                                            | 1.68                     | 0.0147 | <b>0.0436</b> |
| C5 GO Cellular Component | <u>GOCC SPECIFIC GRANULE</u>                                                     | 1.68                     | 0.0000 | <b>0.0438</b> |
| C5 GO Biological Process | <u>GOBP RUFFLE ORGANIZATION</u>                                                  | 1.68                     | 0.0000 | <b>0.0439</b> |
| C5 GO Biological Process | <u>GOBP POSITIVE REGULATION OF UBIQUITIN DEPENDENT PROTEIN CATABOLIC PROCESS</u> | 1.68                     | 0.0017 | <b>0.0442</b> |
| C5 GO Cellular Component | <u>GOCC TERTIARY GRANULE LUMEN</u>                                               | 1.68                     | 0.0000 | <b>0.0442</b> |
| C5 GO Biological Process | <u>GOBP NEGATIVE REGULATION OF IMMUNE SYSTEM PROCESS</u>                         | 1.68                     | 0.0000 | <b>0.0442</b> |
| C2 Reactome pathway      | <u>REACTOME TICAM1 RIP1 MEDIATED IKK COMPLEX RECRUITMENT</u>                     | 1.68                     | 0.0095 | <b>0.0446</b> |
| C5 GO Biological Process | <u>GOBP PROTEIN DESTABILIZATION</u>                                              | 1.68                     | 0.0075 | <b>0.0446</b> |
| C5 GO Molecular Function | <u>GOMF ISOPRENOID BINDING</u>                                                   | -2.09                    | 0.0000 | <b>0.0446</b> |
| C2 Reactome pathway      | <u>REACTOME INTERLEUKIN 10 SIGNALING</u>                                         | 1.68                     | 0.0137 | <b>0.0446</b> |
| C2 Reactome pathway      | <u>REACTOME REGULATION OF PTEN GENE TRANSCRIPTION</u>                            | 1.68                     | 0.0018 | <b>0.0446</b> |
| C2 KEGG pathway          | <u>KEGG LEISHMANIA INFECTION</u>                                                 | 1.67                     | 0.0036 | <b>0.0446</b> |
| C5 GO Biological Process | <u>GOBP RIBONUCLEOPROTEIN COMPLEX BIOGENESIS</u>                                 | 1.68                     | 0.0000 | <b>0.0447</b> |
| C2 Reactome pathway      | <u>REACTOME CROSS PRESENTATION OF SOLUBLE EXOGENOUS ANTIGENS ENDOSOMES</u>       | 1.67                     | 0.0053 | <b>0.0447</b> |

|                          |                                                                                          |      |        |               |
|--------------------------|------------------------------------------------------------------------------------------|------|--------|---------------|
| C5 GO Biological Process | <u>GOBP RESPIRATORY BURST</u>                                                            | 1.67 | 0.0037 | <b>0.0447</b> |
| C2 BioCarta pathway      | <u>BIOCARTA PTEN PATHWAY</u>                                                             | 1.67 | 0.0108 | <b>0.0447</b> |
| C5 GO Cellular Component | <u>GOCC GOLGI ASSOCIATED VESICLE</u>                                                     | 1.67 | 0.0019 | <b>0.0448</b> |
| C5 GO Molecular Function | <u>GOMF HSP70 PROTEIN BINDING</u>                                                        | 1.67 | 0.0018 | <b>0.0448</b> |
| C5 GO Cellular Component | <u>GOCC ENDOSOME MEMBRANE</u>                                                            | 1.67 | 0.0000 | <b>0.0448</b> |
| C5 GO Biological Process | <u>GOBP CELLULAR RESPONSE TO MOLECULE OF BACTERIAL ORIGIN</u>                            | 1.67 | 0.0000 | <b>0.0448</b> |
| C5 GO Cellular Component | <u>GOCC IMMUNOLOGICAL SYNAPSE</u>                                                        | 1.67 | 0.0038 | <b>0.0448</b> |
| C5 GO Biological Process | <u>GOBP MYELOID CELL ACTIVATION INVOLVED IN IMMUNE RESPONSE</u>                          | 1.67 | 0.0000 | <b>0.0449</b> |
| C5 GO Biological Process | <u>GOBP MONOVALENT INORGANIC ANION HOMEOSTASIS</u>                                       | 1.67 | 0.0221 | <b>0.0451</b> |
| C2 WikiPathways pathway  | <u>WP HEAD AND NECK SQUAMOUS CELL CARCINOMA</u>                                          | 1.67 | 0.0035 | <b>0.0451</b> |
| C2 KEGG pathway          | <u>KEGG N GLYCAN BIOSYNTHESIS</u>                                                        | 1.67 | 0.0112 | <b>0.0453</b> |
| C2 Reactome pathway      | <u>REACTOME OXIDATIVE STRESS INDUCED SENESCENCE</u>                                      | 1.67 | 0.0018 | <b>0.0453</b> |
| C2 Reactome pathway      | <u>REACTOME SIGNALING BY WNT</u>                                                         | 1.67 | 0.0000 | <b>0.0453</b> |
| Hallmark                 | <u>HALLMARK IL2 STAT5 SIGNALING</u>                                                      | 1.67 | 0.0016 | <b>0.0453</b> |
| C5 GO Biological Process | <u>GOBP REGULATION OF CARBOHYDRATE CATABOLIC PROCESS</u>                                 | 1.67 | 0.0112 | <b>0.0454</b> |
| C5 GO Biological Process | <u>GOBP COTRANSLATIONAL PROTEIN TARGETING TO MEMBRANE</u>                                | 1.67 | 0.0114 | <b>0.0455</b> |
| C5 GO Biological Process | <u>GOBP REGULATION OF LEUKOCYTE PROLIFERATION</u>                                        | 1.67 | 0.0000 | <b>0.0455</b> |
| C5 GO Cellular Component | <u>GOCC PRERIBOSOME</u>                                                                  | 1.67 | 0.0035 | <b>0.0455</b> |
| C5 GO Biological Process | <u>GOBP REGULATION OF PROTEASOMAL UBIQUITIN DEPENDENT PROTEIN CATABOLIC PROCESS</u>      | 1.67 | 0.0000 | <b>0.0457</b> |
| C5 GO Biological Process | <u>GOBP REGULATION OF TRANSCRIPTION OF NUCLEOLAR LARGE RRNA BY RNA POLYMERASE I</u>      | 1.67 | 0.0057 | <b>0.0457</b> |
| C2 Reactome pathway      | <u>REACTOME TRANSCRIPTIONAL REGULATION BY SMALL RNAS</u>                                 | 1.67 | 0.0071 | <b>0.0458</b> |
| C2 Reactome pathway      | <u>REACTOME GOLGI ASSOCIATED VESICLE BIOGENESIS</u>                                      | 1.67 | 0.0071 | <b>0.0458</b> |
| C2 WikiPathways pathway  | <u>WP MICRORNAS IN CARDIOMYOCYTE HYPERTROPHY</u>                                         | 1.67 | 0.0000 | <b>0.0458</b> |
| C5 GO Biological Process | <u>GOBP REGULATION OF OXIDATIVE STRESS INDUCED INTRINSIC APOPTOTIC SIGNALING PATHWAY</u> | 1.67 | 0.0055 | <b>0.0459</b> |
| C5 GO Biological Process | <u>GOBP T CELL SELECTION</u>                                                             | 1.67 | 0.0035 | <b>0.0460</b> |

| Group                    | Gene Set Name                                | NES                      | p      | FDR q         |
|--------------------------|----------------------------------------------|--------------------------|--------|---------------|
|                          |                                              | post, trained vs control |        |               |
| C5 GO Molecular Function | <u>GOMF TRANSLATION REGULATOR ACTIVITY</u>   | 1.67                     | 0.0000 | <b>0.0460</b> |
| C5 GO Biological Process | <u>GOBP MONONUCLEAR CELL DIFFERENTIATION</u> | 1.67                     | 0.0000 | <b>0.0460</b> |

|                          |                                                                                          |      |        |               |
|--------------------------|------------------------------------------------------------------------------------------|------|--------|---------------|
| C5 GO Biological Process | <u>GOBP MRNA SPLICE SITE SELECTION</u>                                                   | 1.67 | 0.0107 | <b>0.0461</b> |
| C5 GO Biological Process | <u>GOBP INTRINSIC APOPTOTIC SIGNALING PATHWAY IN RESPONSE TO DNA DAMAGE</u>              | 1.67 | 0.0017 | <b>0.0461</b> |
| C5 GO Biological Process | <u>GOBP NCRNA PROCESSING</u>                                                             | 1.67 | 0.0000 | <b>0.0461</b> |
| C5 GO Biological Process | <u>GOBP POSITIVE REGULATION OF CELL ADHESION MEDIATED BY INTEGRIN</u>                    | 1.67 | 0.0096 | <b>0.0462</b> |
| C5 GO Cellular Component | <u>GOCC INTRINSIC COMPONENT OF ORGANELLE MEMBRANE</u>                                    | 1.67 | 0.0000 | <b>0.0462</b> |
| C2 Reactome pathway      | <u>REACTOME TRAF6 MEDIATED NF KB ACTIVATION</u>                                          | 1.67 | 0.0147 | <b>0.0463</b> |
| C5 GO Biological Process | <u>GOBP RIBOSE PHOSPHATE BIOSYNTHETIC PROCESS</u>                                        | 1.66 | 0.0017 | <b>0.0465</b> |
| C5 GO Molecular Function | <u>GOMF NUCLEOCYTOPLASMIC CARRIER ACTIVITY</u>                                           | 1.66 | 0.0055 | <b>0.0467</b> |
| C2 Reactome pathway      | <u>REACTOME CYCLIN A B1 B2 ASSOCIATED EVENTS DURING G2 M TRANSITION</u>                  | 1.66 | 0.0112 | <b>0.0467</b> |
| C5 GO Biological Process | <u>GOBP POSITIVE REGULATION OF ALPHA BETA T CELL DIFFERENTIATION</u>                     | 1.66 | 0.0054 | <b>0.0468</b> |
| C2 PID pathway           | <u>PID CDC42 PATHWAY</u>                                                                 | 1.66 | 0.0053 | <b>0.0468</b> |
| C5 GO Biological Process | <u>GOBP FATTY ACYL COA METABOLIC PROCESS</u>                                             | 1.66 | 0.0200 | <b>0.0468</b> |
| C5 GO Biological Process | <u>GOBP NEGATIVE REGULATION OF MAP KINASE ACTIVITY</u>                                   | 1.66 | 0.0087 | <b>0.0468</b> |
| C2 WikiPathways pathway  | <u>WP FBXL10 ENHANCEMENT OF MAPERK SIGNALING IN DIFFUSE LARGE BCELL LYMPHOMA</u>         | 1.66 | 0.0184 | <b>0.0468</b> |
| C5 GO Cellular Component | <u>GOCC CATALYTIC STEP 2 SPLICEOSOME</u>                                                 | 1.66 | 0.0017 | <b>0.0469</b> |
| C2 WikiPathways pathway  | <u>WP CHEMOKINE SIGNALING PATHWAY</u>                                                    | 1.66 | 0.0000 | <b>0.0469</b> |
| C5 GO Molecular Function | <u>GOMF PHOSPHATIDYLINOSITOL KINASE ACTIVITY</u>                                         | 1.66 | 0.0153 | <b>0.0470</b> |
| C5 GO Cellular Component | <u>GOCC GOLGI APPARATUS SUBCOMPARTMENT</u>                                               | 1.66 | 0.0000 | <b>0.0474</b> |
| C5 GO Biological Process | <u>GOBP POSITIVE REGULATION OF CELLULAR AMIDE METABOLIC PROCESS</u>                      | 1.66 | 0.0000 | <b>0.0474</b> |
| C5 GO Molecular Function | <u>GOMF GENERAL TRANSCRIPTION INITIATION FACTOR BINDING</u>                              | 1.66 | 0.0089 | <b>0.0474</b> |
| C5 GO Biological Process | <u>GOBP PROTEIN LOCALIZATION TO PHAGOPHORE ASSEMBLY SITE</u>                             | 1.66 | 0.0199 | <b>0.0475</b> |
| C5 GO Cellular Component | <u>GOCC U12 TYPE SPLICEOSOMAL COMPLEX</u>                                                | 1.66 | 0.0143 | <b>0.0476</b> |
| C5 GO Molecular Function | <u>GOMF PROTEIN TRANSPORTER ACTIVITY</u>                                                 | 1.66 | 0.0107 | <b>0.0476</b> |
| C5 GO Biological Process | <u>GOBP NEGATIVE REGULATION OF RESPONSE TO DNA DAMAGE STIMULUS</u>                       | 1.66 | 0.0000 | <b>0.0476</b> |
| C5 GO Molecular Function | <u>GOMF CYSTEINE TYPE ENDOPEPTIDASE REGULATOR ACTIVITY INVOLVED IN APOPTOTIC PROCESS</u> | 1.66 | 0.0091 | <b>0.0476</b> |
| C5 GO Biological Process | <u>GOBP MATURATION OF SSU RRNA</u>                                                       | 1.66 | 0.0095 | <b>0.0476</b> |
| C2 BioCarta pathway      | <u>BIOCARTA EIF4 PATHWAY</u>                                                             | 1.66 | 0.0108 | <b>0.0476</b> |
| C2 WikiPathways pathway  | <u>WP AGERAGE PATHWAY</u>                                                                | 1.66 | 0.0017 | <b>0.0477</b> |

|                          |                                                                              |      |        |               |
|--------------------------|------------------------------------------------------------------------------|------|--------|---------------|
| C5 GO Cellular Component | <u>GOCC GOLGI ASSOCIATED VESICLE MEMBRANE</u>                                | 1.66 | 0.0035 | <b>0.0477</b> |
| C2 KEGG pathway          | <u>KEGG RNA DEGRADATION</u>                                                  | 1.66 | 0.0053 | <b>0.0477</b> |
| C5 GO Biological Process | <u>GOBP ANTIGEN PROCESSING AND PRESENTATION OF EXOGENOUS ANTIGEN</u>         | 1.66 | 0.0074 | <b>0.0478</b> |
| C2 PID pathway           | <u>PID INSULIN PATHWAY</u>                                                   | 1.66 | 0.0108 | <b>0.0478</b> |
| C2 WikiPathways pathway  | <u>WP NOTCH SIGNALING</u>                                                    | 1.66 | 0.0107 | <b>0.0478</b> |
| C5 GO Biological Process | <u>GOBP NEGATIVE REGULATION OF RELEASE OF CYTOCHROME C FROM MITOCHONDRIA</u> | 1.66 | 0.0219 | <b>0.0482</b> |
| C2 PID pathway           | <u>PID P38 MK2 PATHWAY</u>                                                   | 1.66 | 0.0134 | <b>0.0482</b> |
| C5 GO Biological Process | <u>GOBP NEGATIVE REGULATION OF PROTEIN ACETYLATION</u>                       | 1.66 | 0.0150 | <b>0.0482</b> |
| C2 Reactome pathway      | <u>REACTOME E3 UBIQUITIN LIGASES UBIQUITINATE TARGET PROTEINS</u>            | 1.66 | 0.0093 | <b>0.0486</b> |
| C5 GO Molecular Function | <u>GOMF PHOSPHOPROTEIN BINDING</u>                                           | 1.66 | 0.0018 | <b>0.0486</b> |
| C5 GO Biological Process | <u>GOBP ESTABLISHMENT OF PROTEIN LOCALIZATION TO CHROMOSOME</u>              | 1.66 | 0.0146 | <b>0.0487</b> |
| C5 GO Cellular Component | <u>GOCC MICROBODY</u>                                                        | 1.65 | 0.0000 | <b>0.0489</b> |

| Group                    | Gene Set Name                                                                        | NES  | p      | FDR q         |
|--------------------------|--------------------------------------------------------------------------------------|------|--------|---------------|
| C5 GO Biological Process | <u>GOBP REGULATION OF IMMUNE EFFECTOR PROCESS</u>                                    | 1.65 | 0.0000 | <b>0.0490</b> |
| C2 WikiPathways pathway  | <u>WP NUCLEOTIDE EXCISION REPAIR</u>                                                 | 1.65 | 0.0127 | <b>0.0491</b> |
| C2 Reactome pathway      | <u>REACTOME DNA REPAIR</u>                                                           | 1.65 | 0.0000 | <b>0.0491</b> |
| C5 GO Biological Process | <u>GOBP REGULATION OF DNA REPAIR</u>                                                 | 1.65 | 0.0000 | <b>0.0492</b> |
| C2 Reactome pathway      | <u>REACTOME INTERLEUKIN 12 SIGNALING</u>                                             | 1.65 | 0.0000 | <b>0.0492</b> |
| C5 GO Biological Process | <u>GOBP LEUKOCYTE HOMEOSTASIS</u>                                                    | 1.65 | 0.0017 | <b>0.0495</b> |
| C2 Reactome pathway      | <u>REACTOME BBSOME MEDIATED CARGO TARGETING TO CILIUM</u>                            | 1.65 | 0.0127 | <b>0.0497</b> |
| C5 GO Biological Process | <u>GOBP NEGATIVE REGULATION OF REACTIVE OXYGEN SPECIES METABOLIC PROCESS</u>         | 1.65 | 0.0108 | <b>0.0498</b> |
| C2 KEGG pathway          | <u>KEGG RENAL CELL CARCINOMA</u>                                                     | 1.65 | 0.0052 | <b>0.0498</b> |
| C5 GO Biological Process | <u>GOBP HISTONE METHYLATION</u>                                                      | 1.65 | 0.0000 | <b>0.0498</b> |
| C5 GO Biological Process | <u>GOBP REGULATION OF GENERATION OF PRECURSOR METABOLITES AND ENERGY</u>             | 1.65 | 0.0000 | <b>0.0498</b> |
| C5 GO Cellular Component | <u>GOCC TERTIARY GRANULE</u>                                                         | 1.65 | 0.0000 | <b>0.0498</b> |
| C2 BioCarta pathway      | <u>BIOCARTA CTCF PATHWAY</u>                                                         | 1.65 | 0.0209 | <b>0.0499</b> |
| C2 WikiPathways pathway  | <u>WP FACTORS AND PATHWAYS AFFECTING INSULINLIKE GROWTH FACTOR IGF1AKT SIGNALING</u> | 1.65 | 0.0129 | <b>0.0499</b> |
| C5 GO Biological Process | <u>GOBP REGULATION OF TRANSCRIPTION BY RNA POLYMERASE I</u>                          | 1.65 | 0.0035 | <b>0.0500</b> |
| C5 GO Biological Process | <u>GOBP COENZYME A METABOLIC PROCESS</u>                                             | 1.65 | 0.0168 | <b>0.0500</b> |
